# Supplementary material for: Orthopalladation of iminophosphoranes: synthesis, structure and study of stability
Source: Royal Society of Chemistry journal article supplement (doi:10.1039/b714485g), 2007-12-20
Supplement: b714485g.pdf [file b714485g.pdf]

# **Orthopalladation of Iminophosphoranes: Synthesis, Structure and Study of Stability**

Raquel Bielsa,<sup>a</sup> Rafael Navarro,<sup>a</sup> Tatiana Soler<sup>b</sup> and Esteban P. Urriolabeitia<sup>a\*</sup>.

<sup>a</sup>*Departamento de Compuestos Organometálicos, Instituto de Ciencia de Materiales de Aragón, CSIC–Universidad de Zaragoza, 50009 Zaragoza, Spain; e-mail: [esteban@unizar.es](mailto:esteban@unizar.es)*

<sup>b</sup>*Servicios Técnicos de Investigación, Facultad de Ciencias Fase II, 03690 San Vicente de Raspeig, Alicante, Spain.*

Dr. Esteban P. Urriolabeitia (corresponding author): Universidad de Zaragoza-C.S.I.C., Plaza de San Francisco s/n, E-50009 Zaragoza (Spain). Fax: (+34) 976761187. E-mail: [esteban@unizar.es](mailto:esteban@unizar.es)

## **ELECTRONIC SUPPLEMENTARY INFORMATION**

## Complete Experimental Section

**Safety note:** *Caution!* Perchlorate salts of metal complexes with organic ligands are potentially explosive. Only small amounts of these materials should be prepared and they should be handled with great caution. See Wolsey, W. C. *J. Chem. Ed.* **1973**, *50*, A335-A337. The organic azides are *highly hazardous* materials which can explode, and whose preparation and manipulation must be carried out with maximum caution. They must be stored at low temperature ( $T \approx 0$  °C) and dissolved in an inert solvent.<sup>1</sup>

**General Methods.** Solvents were dried and distilled under argon using standard procedures before use. Elemental analyses were carried out on a Perkin-Elmer 2400-B microanalyser. Infrared spectra ( $4000\text{-}200\text{ cm}^{-1}$ ) were recorded on a Perkin-Elmer 883 infrared spectrophotometer from nujol mulls between polyethylene sheets. The  $^1\text{H}$ ,  $^{13}\text{C}\{^1\text{H}\}$  and  $^{31}\text{P}\{^1\text{H}\}$  NMR spectra were recorded in  $\text{CDCl}_3$ ,  $\text{CD}_2\text{Cl}_2$  or  $\text{dms}\text{-}d_6$  solutions at 25 °C (other temperatures were specified) on Bruker ARX-300, AvanceII-300, Avance-400 and Avance-500 spectrometers ( $\delta$ , ppm; J, Hz);  $^1\text{H}$  and  $^{13}\text{C}\{^1\text{H}\}$  were referenced using the solvent signal as internal standard while  $^{31}\text{P}\{^1\text{H}\}$  was externally referenced to  $\text{H}_3\text{PO}_4$  (85%). The  $^1\text{H}$  SELNO-1D and SELRO-1D NMR experiments were performed with optimized mixing times (D8/P15), depending of the irradiated signal. ESI/APCI mass spectra were recorded using an Esquire 3000 ion – trap mass spectrometer (Bruker Daltonic GmbH, Bremen, Germany) equipped with a standard ESI/APCI source. Samples were introduced by direct infusion with a syringe pump. Nitrogen served both as the nebulizer gas and the dry gas. Helium served as a cooling gas for the ion trap and collision gas for  $\text{MS}^n$  experiments. Other mass spectra (positive ion FAB) were recorded from  $\text{CH}_2\text{Cl}_2$  solutions on a V. G. Autospec spectrometer. The starting azides  $\text{N}_3\text{CH}_2\text{CO}_2\text{Me}$ ,  $\text{N}_3\text{CH}_2\text{CONMe}_2$ ,  $\text{N}_3\text{CH}_2\text{CH}_2\text{SMe}$  and  $\text{N}_3\text{CH}_2\text{-}2\text{-NC}_5\text{H}_4$  were prepared according to published procedures.<sup>1</sup>

**Synthesis of [Ph<sub>3</sub>P=NCH<sub>2</sub>COOMe] (1a).** To a solution of N<sub>3</sub>CH<sub>2</sub>CO<sub>2</sub>Me (0.795 g, 6.90 mmol) in freshly distilled CH<sub>2</sub>Cl<sub>2</sub> (10 mL) under Ar atmosphere, a solution of PPh<sub>3</sub> (1.80 g, 6.90 mmol) in dry CH<sub>2</sub>Cl<sub>2</sub> (10 mL) was added dropwise. The addition was completed in 20 min, and during this time the evolution of N<sub>2</sub> was evident. The resulting solution was stirred at room temperature for 12 h, until the evolution of N<sub>2</sub> ceased. Then, the solvent was evaporated to dryness, giving **1a** as a slightly pink oil. The compound can be used in subsequent reactions without further purification. Yield: 1.952 g (81.0%). Anal. Calc. for C<sub>21</sub>H<sub>20</sub>NO<sub>2</sub>P (349.36): C, 72.20; H, 5.77; N, 4.01. Found: C, 71.70; H, 5.69; N, 3.85. IR (ν, cm<sup>-1</sup>): 1746 (ν<sub>CO</sub>), 1295 (ν<sub>PN</sub>). MS (MALDI) [m/z, (%): 350 (100) [M+H]<sup>+</sup>. <sup>1</sup>H NMR (CDCl<sub>3</sub>): δ = 3.48 (s, 3H, OMe), 3.82 (d, 2H, <sup>3</sup>J<sub>PH</sub> = 21.8, CH<sub>2</sub>), 7.33-7.35 (m, 6H, H<sub>m</sub>, PPh<sub>3</sub>), 7.36-7.42 (m, 3H, H<sub>p</sub>, PPh<sub>3</sub>), 7.56-7.61 (m, 6H, H<sub>o</sub>, PPh<sub>3</sub>). <sup>13</sup>C {<sup>1</sup>H} NMR (CDCl<sub>3</sub>): δ = 48.21 (d, <sup>2</sup>J<sub>PC</sub> = 3.4, CH<sub>2</sub>), 51.43 (OMe), 128.41 (d, <sup>3</sup>J<sub>PC</sub> = 11.6, C<sub>m</sub>, PPh<sub>3</sub>), 130.83 (d, <sup>1</sup>J<sub>PC</sub> = 97.1, C<sub>i</sub>, PPh<sub>3</sub>), 131.44 (d, <sup>4</sup>J<sub>PC</sub> = 2.7, C<sub>p</sub>, PPh<sub>3</sub>), 132.62 (d, <sup>2</sup>J<sub>PC</sub> = 9.1, C<sub>o</sub>, PPh<sub>3</sub>), 175.44 (d, <sup>3</sup>J<sub>PC</sub> = 17.5, CO). <sup>31</sup>P {<sup>1</sup>H} NMR (CDCl<sub>3</sub>): δ = 15.58.

**Synthesis of [Ph<sub>3</sub>P=NCH<sub>2</sub>CONMe<sub>2</sub>] (1b).** Compound **1b** was obtained following the same experimental procedure than that described for **1a**. Thus, N<sub>3</sub>CH<sub>2</sub>C(O)NMe<sub>2</sub> (0.208 g, 1.50 mmol) was reacted with PPh<sub>3</sub> (0.393 g, 1.50 mmol) in dry CH<sub>2</sub>Cl<sub>2</sub> (30 mL) to give **1b** as a white solid. Yield: 0.570 g (83.3%). Anal. Calc. for C<sub>22</sub>H<sub>23</sub>N<sub>2</sub>OP (362.4): C, 72.91; H, 6.40; N, 7.73. Found: C, 71.98; H, 6.69; N, 7.75. IR (ν, cm<sup>-1</sup>): 1639 (ν<sub>CO</sub>), 1304 (ν<sub>PN</sub>). MS (MALDI) [m/z, (%): 363.1 (100) [M+H]<sup>+</sup>. <sup>1</sup>H NMR (CDCl<sub>3</sub>): δ = 2.77 (s, 3H, NMe), 3.17 (s, 3H, NMe), 3.94 (d, 2H, <sup>3</sup>J<sub>PH</sub> = 16.5, CH<sub>2</sub>), 7.42-7.48 (m, 6H, H<sub>m</sub>, PPh<sub>3</sub>), 7.50-7.56 (m, 3H, H<sub>p</sub>, PPh<sub>3</sub>), 7.66-7.72 (m, 6H, H<sub>o</sub>, PPh<sub>3</sub>). <sup>31</sup>P {<sup>1</sup>H} NMR (CDCl<sub>3</sub>): δ = 16.37.

**Synthesis of [Ph<sub>3</sub>P=NCH<sub>2</sub>CH<sub>2</sub>SMe] (1c).** Compound **1c** was obtained following the same preparative method than that described for **1a**. Thus, N<sub>3</sub>CH<sub>2</sub>CH<sub>2</sub>SMe (1.21 g, 10.3 mmol) was reacted with PPh<sub>3</sub> (2.71 g, 10.3 mmol) in dry CH<sub>2</sub>Cl<sub>2</sub> (50 mL) to give **1c** as a white solid.

Yield: 3.31 g (91.6%). Anal. Calc. for C<sub>21</sub>H<sub>22</sub>NPS (351.4): C, 71.77; H, 6.31; N, 3.99. Found: C, 71.42; H, 5.99; N, 3.47. IR (ν, cm<sup>-1</sup>): 1246 (ν<sub>PN</sub>). MS (MALDI) [m/z, (%): 352 (55) [M+H]<sup>+</sup>. <sup>1</sup>H NMR (CDCl<sub>3</sub>): δ = 1.93 (s, 3H, SMe), 2.59 (m, 2H, CH<sub>2</sub>S), 3.23 (m, 2H, NCH<sub>2</sub>), 7.38-7.41 (m, 6H, H<sub>m</sub>, PPh<sub>3</sub>), 7.45-7.48 (m, 3H, H<sub>p</sub>, PPh<sub>3</sub>), 7.57-7.63 (m, 6H, H<sub>o</sub>, PPh<sub>3</sub>). <sup>13</sup>C{<sup>1</sup>H} NMR (CDCl<sub>3</sub>): δ = 15.65 (SMe), 39.04 (d, <sup>3</sup>J<sub>PC</sub> = 17.3, CH<sub>2</sub>S), 45.76 (d, <sup>2</sup>J<sub>PC</sub> = 4.89, NCH<sub>2</sub>), 128.50 (d, <sup>3</sup>J<sub>PC</sub> = 12.1, C<sub>m</sub>, PPh<sub>3</sub>), 131.94 (d, <sup>4</sup>J<sub>PC</sub> = 2.7, C<sub>p</sub>, PPh<sub>3</sub>), 132.07 (d, <sup>2</sup>J<sub>PC</sub> = 9.8, C<sub>o</sub>, PPh<sub>3</sub>), 132.68 (d, <sup>1</sup>J<sub>PC</sub> = 77.6, C<sub>i</sub>, PPh<sub>3</sub>). <sup>31</sup>P{<sup>1</sup>H} NMR (CDCl<sub>3</sub>): δ = 12.20.

**Synthesis of [Ph<sub>3</sub>P=NCH<sub>2</sub>-2-NC<sub>5</sub>H<sub>4</sub>] (1d).** Compound **1d** was obtained following the same preparative method than that described for **1a**. Thus, N<sub>3</sub>CH<sub>2</sub>-2-NC<sub>5</sub>H<sub>4</sub> (1.35 g, 10.1 mmol) was reacted with PPh<sub>3</sub> (2.63 g, 10.1 mmol) in dry CH<sub>2</sub>Cl<sub>2</sub> (40 mL) to give **1d** as a yellow oil. Yield: 3.75 g (100%). Anal. Calc. for C<sub>24</sub>H<sub>21</sub>N<sub>2</sub>P (368.4): C, 78.24; H, 5.75; N, 7.60. Found: C, 78.13; H, 6.03; N, 7.16. IR (ν, cm<sup>-1</sup>): 1306 (ν<sub>PN</sub>). MS (MALDI) [m/z, (%): 369 (100) [M+H]<sup>+</sup>. <sup>1</sup>H NMR (CDCl<sub>3</sub>): δ = 4.43 (d, 2H, <sup>3</sup>J<sub>PH</sub> = 17.2, CH<sub>2</sub>), 6.94-6.97 (m, 1H, H<sub>5</sub>, py), 7.21-7.24 (m, 1H, H<sub>3</sub>, py), 7.34-7.39 (m, 6H, H<sub>m</sub>, PPh<sub>3</sub>), 7.40-7.45 (m, 3H, H<sub>p</sub>, PPh<sub>3</sub>), 7.59-7.64 (m, 6H, H<sub>o</sub>, PPh<sub>3</sub>), 7.86 (d, 1H, <sup>3</sup>J<sub>HH</sub> = 7.8, H<sub>4</sub>, py), 8.32 (d, 1H, <sup>3</sup>J<sub>HH</sub> = 4.4, H<sub>6</sub>, py). <sup>13</sup>C{<sup>1</sup>H} NMR (CDCl<sub>3</sub>): δ = 46.86 (CH<sub>2</sub>), 120.20 (C<sub>5</sub>, py), 120.80 (C<sub>3</sub>, py), 127.48 (d, <sup>3</sup>J<sub>PC</sub> = 12.1, C<sub>m</sub>, PPh<sub>3</sub>), 130.91 (d, <sup>4</sup>J<sub>PC</sub> = 2.7, C<sub>p</sub>, PPh<sub>3</sub>), 131.07 (d, <sup>2</sup>J<sub>PC</sub> = 9.8, C<sub>o</sub>, PPh<sub>3</sub>), 131.34 (d, <sup>1</sup>J<sub>PC</sub> = 140.1, C<sub>i</sub>, PPh<sub>3</sub>), 135.55 (C<sub>4</sub>, py), 148.29 (C<sub>6</sub>, py), 160.97 (C<sub>2</sub>, py). <sup>31</sup>P{<sup>1</sup>H} NMR (CDCl<sub>3</sub>): δ = 13.70.

**Synthesis of [Pd(μ-Cl){C<sub>6</sub>H<sub>4</sub>(PPh<sub>2</sub>=NCH<sub>2</sub>COOMe|-C,N)-2}]<sub>2</sub> (2a).** To a solution of **1a** (1.950 g, 5.58 mmol) in CH<sub>2</sub>Cl<sub>2</sub> (20 mL), Pd(OAc)<sub>2</sub> (1.250 g, 5.58 mmol) was added, and the resulting mixture was refluxed for 1 h. After the reaction time, decomposition is evident. The cooled black suspension was treated with charcoal for 15 min, and then filtered over Celite giving a deep orange solution. This solution, which contains the acetate bridge intermediate, was evaporated to dryness. The oily brown residue was redissolved in MeOH and treated with

an excess of anhydrous LiCl (0.946 g, 22.3 mmol). After few seconds an orange solid precipitated, but the stirring was maintained for additional 3 h at 25 °C. The resulting suspension was filtered, and the orange solid was washed with MeOH (20 mL) and Et<sub>2</sub>O (50 mL), dried by suction and identified as the equilibrium mixture **2a**. Yield: 1.340 g (49%). Compound **2a** crystallized as **2a**·2CHCl<sub>3</sub> from slow vapour diffusion of Et<sub>2</sub>O into a CHCl<sub>3</sub> solution of the crude compound. These crystals were used for spectroscopic and analytic measurements. Anal. Calc. for [C<sub>42</sub>H<sub>38</sub>Cl<sub>2</sub>N<sub>2</sub>O<sub>4</sub>P<sub>2</sub>Pd<sub>2</sub>]<sub>2</sub>CHCl<sub>3</sub> (1219.12): C, 43.35; H, 3.31; N, 2.30. Found: C, 43.32; H, 3.52; N, 2.29. IR (ν, cm<sup>-1</sup>): 1725 (ν<sub>CO</sub>), 1254 (ν<sub>PN</sub>). MS (FAB<sup>+</sup>) [m/z, (%): 943 (100) [M<sub>2</sub> - Cl]<sup>+</sup>. <sup>1</sup>H NMR (CDCl<sub>3</sub>): δ = 3.44-3.67 (very broad, 5H, CH<sub>2</sub> + OMe), 6.72-6.76 (m, 1H, H<sub>3</sub>, C<sub>6</sub>H<sub>4</sub>), 6.87 (dd, 1H, <sup>4</sup>J<sub>HH</sub> = 5.4, <sup>3</sup>J<sub>HH</sub> = 9.3, H<sub>4</sub>, C<sub>6</sub>H<sub>4</sub>), 7.00 (t, 1H, <sup>3</sup>J<sub>HH</sub> = 5.4, H<sub>5</sub>, C<sub>6</sub>H<sub>4</sub>), 7.42-7.46 (m, 4H, H<sub>m</sub>, PPh<sub>2</sub>), 7.53-7.56 (m, 3H, 2 H<sub>p</sub> (PPh<sub>2</sub>) + H<sub>6</sub> (C<sub>6</sub>H<sub>4</sub>)), 7.67-7.71 (m, 4H, H<sub>o</sub>, PPh<sub>2</sub>). <sup>13</sup>C {<sup>1</sup>H} NMR (CDCl<sub>3</sub>): δ = 48.69 (CH<sub>2</sub>), 51.76 (OMe), 124.13 (d, <sup>3</sup>J<sub>PC</sub> = 14.4, C<sub>4</sub>, C<sub>6</sub>H<sub>4</sub>), 128.24 (d, <sup>2</sup>J<sub>PC</sub> = 12.3, C<sub>3</sub>, C<sub>6</sub>H<sub>4</sub>), 129.05 (d, <sup>3</sup>J<sub>PC</sub> = 11.3, C<sub>m</sub>, PPh<sub>2</sub>), 131.91 (C<sub>p</sub>, PPh<sub>2</sub>), 132.10 (d, <sup>4</sup>J<sub>PC</sub> = 9.2, C<sub>5</sub>, C<sub>6</sub>H<sub>4</sub>), 132.98 (d, <sup>2</sup>J<sub>PC</sub> = 9.3, C<sub>o</sub>, PPh<sub>2</sub>), 134.89 (d, <sup>3</sup>J<sub>PC</sub> = 10.3, C<sub>6</sub>, C<sub>6</sub>H<sub>4</sub>), 174.75 (CO). Signals to be assigned to the carbon atoms C<sub>i</sub> (PPh<sub>2</sub>) and C<sub>1</sub>, C<sub>2</sub> (C<sub>6</sub>H<sub>4</sub>) were not observed. <sup>31</sup>P {<sup>1</sup>H} NMR (CDCl<sub>3</sub>): δ = 57.50. <sup>1</sup>H NMR (CDCl<sub>3</sub>, 253 K): δ = 3.53 (OMe), 3.55 (OMe), 3.61 (d, <sup>3</sup>J<sub>PH</sub> = 18.6, CH<sub>2</sub>), 3.72 (d, <sup>3</sup>J<sub>PH</sub> = 18.9, CH<sub>2</sub>), 3.82 (OMe), 3.88 (d, <sup>3</sup>J<sub>PH</sub> = 7.6, CH<sub>2</sub>), 6.84-6.88 (m, H<sub>3</sub>, C<sub>6</sub>H<sub>4</sub>), 6.98-7.01 (m, H<sub>4</sub>, C<sub>6</sub>H<sub>4</sub>), 7.07-7.15 (m, H<sub>5</sub>, C<sub>6</sub>H<sub>4</sub>), 7.52-7.55 (m, H<sub>m</sub>, PPh<sub>3</sub>), 7.63-7.66 (m, H<sub>p</sub> (PPh<sub>3</sub>) + H<sub>6</sub> (C<sub>6</sub>H<sub>4</sub>)), 7.75-7.79 (m, H<sub>o</sub>, PPh<sub>3</sub>). <sup>31</sup>P {<sup>1</sup>H} NMR (CDCl<sub>3</sub>, 253K): δ = 50.55 (mononuclear), 58.12, 58.17 (cis + trans dinuclear). Dinuclear/mononuclear molar ratio = 5/1.

**Synthesis of [Pd{C<sub>6</sub>H<sub>4</sub>(PPh<sub>2</sub>=NCH<sub>2</sub>CONMe<sub>2</sub>)-C,N,O}-2](Cl) (**2b**).** Complex **2b** was prepared following the same preparative method than that described for **2a**. Thus, **1b** (0.570 g, 1.53 mmol) was reacted with Pd(OAc)<sub>2</sub> (0.343 g, 1.53 mmol) in refluxing CH<sub>2</sub>Cl<sub>2</sub> (20 mL), and with excess LiCl (0.946 g, 22.3 mmol) in MeOH (20 mL) to give **2b** as a yellow solid.

Yield: 0.215 g (27.4%). Anal. Calc. for  $C_{22}H_{22}ClN_2OPd$  (503.3): C, 52.45; H, 4.40; N, 5.56. Found: C, 51.90; H, 4.85; N, 5.46. IR ( $\nu$ ,  $cm^{-1}$ ): 1607 ( $\nu_{CO}$ ), 1258 ( $\nu_{PN}$ ). MS (FAB+) [ $m/z$ , (%): 467 (100)  $[M-Cl]^+$ .  $^1H$  NMR (DMSO- $d_6$ ):  $\delta$  = 2.81 (s, 3H, NMe), 2.85 (s, 3H, NMe), 3.96 (d, 2H,  $^3J_{PH}$  = 6.8,  $CH_2$ ), 6.84-6.89 (m, 1H,  $C_6H_4$ ), 6.96-7.00 (m, 1H,  $C_6H_4$ ), 7.05-7.08 (m, 1H,  $C_6H_4$ ), 7.65-7.78 (m, 11H, 1H ( $C_6H_4$ ) + 10H ( $PPh_2$ )).  $^{31}P\{^1H\}$  NMR (DMSO- $d_6$ ):  $\delta$  = 48.13.

**Synthesis of  $[Pd\{C_6H_4(PPh_2=NCH_2CH_2SMe)-C,N,S\}-2\}(Cl)]$  (**2c**).** Complex **2c** was prepared following the same preparative method than that described for **2a**, except that the reaction time was 5 h. Thus, **1c** (0.675 g, 1.72 mmol) was reacted with  $Pd(OAc)_2$  (0.386 g, 1.72 mmol) in  $CH_2Cl_2$  (20 mL), and with excess LiCl (0.291 g, 6.80 mmol) in MeOH (20 mL) to give **2c** as a deep yellow solid. Yield: 0.426 g (57.2%). Anal. Calc. for  $C_{21}H_{21}ClNPPdS$  (492.0): C, 51.22; H, 4.29; N, 2.84. Found: C, 51.11; H, 4.24; N, 2.92. IR ( $\nu$ ,  $cm^{-1}$ ): 1228 ( $\nu_{PN}$ ). MS (FAB+) [ $m/z$ , (%): 492 (27)  $[M]^+$ .  $^1H$  NMR ( $CD_2Cl_2$ ):  $\delta$  = 2.32 (s, 3H, SMe), 2.79 (s, br, 2H,  $SCH_2$ ), 2.91 (dd, 2H,  $^3J_{HH}$  = 5.8,  $^2J_{PH}$  = 12.6,  $NCH_2$ ), 6.82 (ddd, 1H,  $^3J_{HH}$  = 7.5,  $^4J_{HH}$  = 1.5,  $^3J_{PH}$  = 9.1,  $H_3$ ,  $C_6H_4$ ), 6.98 (tdd, 1H,  $^3J_{HH}$  = 7.4,  $^4J_{HH}$  = 1.1,  $^4J_{PH}$  = 5.0,  $H_4$ ,  $C_6H_4$ ), 7.17 (tt, 1H,  $^4J_{HH}$  = 1.6,  $^3J_{PH}$  = 7.7,  $H_5$ ,  $C_6H_4$ ), 7.50-7.54 (m, 4H,  $H_m$ ,  $PPh_2$ ), 7.61-7.68 (m, 6H,  $4H_o$  +  $2H_p$ ,  $PPh_2$ ), 7.92 (ddd, 1H,  $^4J_{HH}$  = 1.0,  $^3J_{HH}$  = 9.4,  $^4J_{PH}$  = 1.9,  $H_6$ ,  $C_6H_4$ ).  $^{13}C\{^1H\}$  NMR ( $CD_2Cl_2$ ):  $\delta$  = 17.77 (SMe), 42.41 (d,  $^3J_{PC}$  = 18.4,  $SCH_2$ ), 45.40 ( $NCH_2$ ), 124.40 (d,  $^3J_{PC}$  = 14.6,  $C_4$ ,  $C_6H_4$ ), 127.01 (d,  $^1J_{PC}$  = 83.6,  $C_i$ ,  $PPh_2$ ), 128.51 (d,  $^2J_{PC}$  = 12.1,  $C_3$ ,  $C_6H_4$ ), 129.15 (d,  $^3J_{PC}$  = 11.5,  $C_m$ ,  $PPh_2$ ), 131.07 (d,  $^4J_{PC}$  = 3.2,  $C_5$ ,  $C_6H_4$ ), 132.57 (d,  $^3J_{PC}$  = 9.7,  $C_o$ ,  $PPh_2$ ), 133.02 (d,  $^4J_{PC}$  = 2.5,  $C_p$ ,  $PPh_2$ ), 136.43 (d,  $^3J_{PC}$  = 14.8,  $C_6$ ,  $C_6H_4$ ), 140.67 (d,  $^2J_{PC}$  = 141,  $C_2$ ,  $C_6H_4$ ), 157.21 (d,  $^2J_{PC}$  = 20.2,  $C_1$ ,  $C_6H_4$ ).  $^{31}P\{^1H\}$  NMR ( $CD_2Cl_2$ ):  $\delta$  = 50.37.

**Synthesis of  $[Pd\{C_6H_4(PPh_2=NCH_2-C_5H_4N-2')-C,N,N\}-2\}(Cl)]$  (**2d**).** Complex **2d** was prepared following the same preparative method than that described for **2a**, except that the reaction solvent was toluene. Thus, **1d** (0.300 g, 0.81 mmol) was reacted with  $Pd(OAc)_2$  (0.18

g, 0.81 mmol) in refluxing toluene (20 mL), and with excess LiCl (0.210 g, 5.00 mmol) in MeOH (20 mL) to give **2d** as a deep orange solid. Yield: 0.315 g (76%). Anal. Calc. for  $C_{24}H_{20}ClN_2PPd$  (509.2): C, 56.55; H, 3.95; N, 5.50. Found: C, 56.10; H, 3.47; N, 5.16. IR ( $\nu$ ,  $cm^{-1}$ ): 1287 ( $\nu_{PN}$ ). MS (FAB+) [ $m/z$ , (%): 507 (20)  $[M-2H]^+$ .  $^1H$  NMR ( $CDCl_3$ ):  $\delta$  = 4.41 (d, 2H,  $^3J_{PH} = 7.0$ ,  $CH_2$ ), 6.80 (ddd, 1H,  $^4J_{HH} = 1.4$ ,  $^3J_{HH} = 7.6$ ,  $J_{PH} = 11.2$ ,  $C_6H_4$ ), 6.95 (m, 1H,  $C_6H_4$ ), 7.10 (d, 1H,  $J_{HH} = 7.8$ ,  $C_6H_4$ ), 7.15-7.19 (m, 2H,  $H_4$ ,  $H_5$ , py), 7.52-7.57 (m, 4H,  $H_m$ ,  $PPh_2$ ), 7.61-7.66 (m, 3H,  $2H_p$  ( $PPh_2$ ) + 1H ( $C_6H_4$ )), 7.74-7.79 (m, 4H,  $H_o$ ,  $PPh_2$ ), 8.12 (ddd, 1H,  $^5J_{HH} = 0.7$ ,  $^4J_{HH} = 2.3$ ,  $^3J_{HH} = 7.8$ ,  $H_3$ , py), 8.98 (dd, 1H,  $^5J_{HH} = 0.7$ ,  $^3J_{HH} = 5.3$ ,  $H_6$ , py).  $^{13}C\{^1H\}$  NMR ( $CDCl_3$ ):  $\delta$  = 51.43 ( $CH_2$ ), 119.51 ( $C_6H_4$ ), 121.33 (py), 123.00 (d,  $J_{PC} = 15.1$ ,  $C_6H_4$ ), 126.05 (d,  $^1J_{PC} = 83.7$ ,  $C_i$ ,  $PPh_2$ ), 127.99 (d,  $J_{PC} = 22.0$ ,  $C_6H_4$ ), 128.25 (d,  $^3J_{PC} = 11.5$ ,  $C_m$ ,  $PPh_2$ ), 130.0 (d,  $J_{PC} = 3.2$ , py), 131.76 (d,  $^2J_{PC} = 9.8$ ,  $C_o$ ,  $PPh_2$ ), 132.09 (d,  $^4J_{PC} = 2.7$ ,  $C_p$ ,  $PPh_2$ ), 136.18 ( $C_6H_4$ ), 137.58 (d,  $^4J_{PC} = 14.7$ ,  $C_3$ , py), 141.05 (d,  $^1J_{PC} = 142.4$ ,  $C_2$ ,  $C_6H_4$ ), 148.22 ( $C_6$ , py), 153.97 (d,  $^2J_{PC} = 19.0$ ,  $C_1$ ,  $C_6H_4$ ), 165.40 (d,  $^3J_{PC} = 17.5$ ,  $C_2$ , py).  $^{31}P\{^1H\}$  NMR ( $CDCl_3$ ):  $\delta$  = 48.53.

**Synthesis of  $[Pd\{C_6H_4(PPh_2=NCH_2COOMe)-C,N\}-2\}(NCMe)_2](ClO_4)$  (**3a**).** A suspension of **2a** (0.200 g, 2.03 mmol) in dry NCMe (15 mL) was treated with  $AgClO_4$  (0.084 g, 4.07 mmol), and the resulting suspension was stirred at 25 °C for 1h with exclusion of light. After the reaction time, the insoluble AgCl was filtered, and the resulting solution was evaporated to small volume ( $\approx$  2 mL). By  $Et_2O$  (20 mL) addition and further stirring, **3a** was obtained as a white solid. Yield: 0.187 g (72.5%). Anal. Calc. for  $C_{25}H_{25}ClN_3O_6PPd$  (636.3): C, 47.19; H, 3.96; N, 6.60. Found: C, 47.31; H, 3.64; N, 6.82. IR ( $\nu$ ,  $cm^{-1}$ ): 2291 ( $\nu_{CN}$ ), 1741 ( $\nu_{CO}$ ), 1216 ( $\nu_{PN}$ ). MS (FAB+) [ $m/z$ , (%): 455 (100)  $[M-2NCMe-ClO_4]^+$ .  $^1H$  NMR ( $CDCl_3$ ):  $\delta$  = 2.00 (s, 3H, NCMe), 2.51 (s, 3H, NCMe), 3.83 (s, 3H, OMe), 3.88 (d, 2H,  $^3J_{PH} = 8.1$ ,  $CH_2$ ), 6.90 (ddd, 1H,  $J_{HH} = 0.6$ ,  $J_{HH} = 2.8$ ,  $J_{HH} = 7.2$ ,  $C_6H_4$ ), 7.11-7.18 (m, 1H,  $C_6H_4$ ), 7.21-7.29 (m, 2H,  $C_6H_4$ ), 7.60-7.77 (m, 10H,  $PPh_2$ ).  $^{13}C\{^1H\}$  NMR ( $CDCl_3$ ):  $\delta$  = 2.16 (NCMe), 3.79 (NCMe), 49.12

(CH<sub>2</sub>), 54.87 (OMe), 124.25 (d, <sup>1</sup>J<sub>PC</sub> = 50.1, C<sub>i</sub>, PPh<sub>2</sub>), 125.97 (d, J<sub>PC</sub> = 14.5, C<sub>6</sub>H<sub>4</sub>), 129.86 (d, <sup>3</sup>J<sub>PC</sub> = 11.9, C<sub>m</sub>, PPh<sub>2</sub>), 130.16 (C<sub>6</sub>H<sub>4</sub>), 131.90 (C<sub>6</sub>H<sub>4</sub>), 132.16 (d, <sup>2</sup>J<sub>PC</sub> = 10.2, C<sub>o</sub>, PPh<sub>2</sub>), 134.22 (d, <sup>4</sup>J<sub>PC</sub> = 1.0, C<sub>p</sub>, PPh<sub>2</sub>), 136.20 (d, J<sub>PC</sub> = 13.3, C<sub>6</sub>H<sub>4</sub>), 178.4 (d, <sup>3</sup>J<sub>PC</sub> = 2.2, CO). Signals to assign to C<sup>1</sup>, C<sup>2</sup> (C<sub>6</sub>H<sub>4</sub>) and CN carbon atoms were not observed. <sup>31</sup>P{<sup>1</sup>H} NMR (CDCl<sub>3</sub>): δ = 57.64.

**Synthesis of [PdCl{C<sub>6</sub>H<sub>4</sub>(PPh<sub>2</sub>=NCH<sub>2</sub>COOMe)-C,N}-2]{PPh<sub>3</sub>} (4a).** To a suspension of **2a** (0.150 g, 1.52 mmol) in 15 mL of CH<sub>2</sub>Cl<sub>2</sub>, PPh<sub>3</sub> (0.080 g, 3.05 mmol) was added. The initial suspension gradually dissolved and, after the reaction time (1 h), a clear yellow solution was obtained. Any insoluble impurity was filtered at this point and discarded. The resulting clear solution was evaporated to dryness and Et<sub>2</sub>O (20 mL) was added to the oily residue. Further stirring allowed the isolation of **4a** as a yellow solid. Yield: 0.176 g (77.2%). Anal. Calc. for C<sub>39</sub>H<sub>34</sub>ClNO<sub>2</sub>P<sub>2</sub>Pd (751.9): C, 62.00; H, 4.50; N, 1.80. Found: C, 61.97; H, 3.92; N, 1.63. IR (ν, cm<sup>-1</sup>): 1762 (ν<sub>CO</sub>), 1262 (ν<sub>PN</sub>). MS (FAB+) [m/z, (%): 717 (100) [M-Cl]<sup>+</sup>. <sup>1</sup>H NMR (CDCl<sub>3</sub>): δ = 3.43 (s, 3H, OMe), 4.12 (dd, 2H, <sup>4</sup>J<sub>PH</sub> = 19.7, <sup>3</sup>J<sub>PH</sub> = 5.3, CH<sub>2</sub>), 6.39 (t, 1H, <sup>3</sup>J<sub>HH</sub> = 7.5, H<sub>5</sub>, C<sub>6</sub>H<sub>4</sub>), 6.54 (dt, 1H, <sup>3</sup>J<sub>HH</sub> = 7.3, <sup>4</sup>J<sub>HH</sub> = 1.5, H<sub>6</sub>, C<sub>6</sub>H<sub>4</sub>), 6.65 (dd, 1H, <sup>3</sup>J<sub>HH</sub> = 7.3, <sup>4</sup>J<sub>PH</sub> = 12.1, H<sub>4</sub>, C<sub>6</sub>H<sub>4</sub>), 6.82 (ddd, 1H, <sup>3</sup>J<sub>HH</sub> = 7.5, <sup>4</sup>J<sub>HH</sub> = 1.5, <sup>3</sup>J<sub>PH</sub> = 9.0, H<sub>3</sub>, C<sub>6</sub>H<sub>4</sub>), 7.16-7.20 (m, 6H, H<sub>m</sub>, PPh<sub>3</sub>), 7.25-7.30 (m, 3H, H<sub>p</sub>, PPh<sub>3</sub>), 7.44-7.49 (td, 4H, <sup>3</sup>J<sub>HH</sub> = 7.3, <sup>4</sup>J<sub>HH</sub> = 2.5, H<sub>m</sub>, PPh<sub>2</sub>), 7.54-7.58 (m, 8H, 6H<sub>o</sub> (PPh<sub>3</sub>) + 2H<sub>p</sub> (PPh<sub>2</sub>)) 7.80 (dd, 4H, <sup>3</sup>J<sub>HH</sub> = 7.0, <sup>3</sup>J<sub>PH</sub> = 11.3, H<sub>o</sub>, PPh<sub>2</sub>). <sup>13</sup>C{<sup>1</sup>H} NMR (CDCl<sub>3</sub>): δ = 47.83 (d, <sup>3</sup>J<sub>PC</sub> = 2.3, CH<sub>2</sub>), 51.46 (s, OMe), 122.87 (d, J<sub>PC</sub> = 14.1, C<sub>6</sub>H<sub>4</sub>), 127.78 (d, <sup>3</sup>J<sub>PC</sub> = 10.7, C<sub>m</sub>, PPh<sub>3</sub>), 128.09 (d, J<sub>PC</sub> = 10.9, C<sub>6</sub>H<sub>4</sub>), 128.76 (d, <sup>3</sup>J<sub>PC</sub> = 11.4, C<sub>m</sub>, PPh<sub>2</sub>), 129.19 (C<sub>6</sub>H<sub>4</sub>), 130.08 (d, <sup>4</sup>J<sub>PC</sub> = 1.9, C<sub>p</sub>, PPh<sub>3</sub>), 130.39 (d, <sup>1</sup>J<sub>PC</sub> = 65.8, C<sub>i</sub>, PPh<sub>2</sub>), 131.94 (d, <sup>1</sup>J<sub>PC</sub> = 48.8, C<sub>i</sub>, PPh<sub>3</sub>), 132.50 (d, <sup>4</sup>J<sub>PC</sub> = 2.1, C<sub>p</sub>, PPh<sub>2</sub>), 133.37 (d, <sup>2</sup>J<sub>PC</sub> = 9.7, C<sub>o</sub>, PPh<sub>2</sub>), 135.25 (d, <sup>2</sup>J<sub>PC</sub> = 11.7, C<sub>o</sub>, PPh<sub>3</sub>), 139.75 (dd, J<sub>PC</sub> = 13.2, J<sub>PC</sub> = 14.8, C<sub>6</sub>H<sub>4</sub>), 141.16 (d, <sup>1</sup>J<sub>PC</sub> = 136.6, C<sub>2</sub>, C<sub>6</sub>H<sub>4</sub>), 159.34 (d, <sup>2</sup>J<sub>PC</sub> = 18.8, C<sub>1</sub>, C<sub>6</sub>H<sub>4</sub>), 173.98 (d, <sup>3</sup>J<sub>PC</sub> = 10.8, CO). <sup>31</sup>P{<sup>1</sup>H} NMR (CDCl<sub>3</sub>): δ = 38.82 (d, <sup>3</sup>J<sub>PP</sub> = 2.5, PPh<sub>3</sub>), 46.76 (d, <sup>3</sup>J<sub>PP</sub> = 2.9, C<sub>6</sub>H<sub>4</sub>PPh<sub>2</sub>).



**Synthesis of [PdCl{C<sub>6</sub>H<sub>4</sub>(PPh<sub>2</sub>=NCH<sub>2</sub>COOMe)-C,N}-2}(py)] (5a).** Complex **5a** was prepared following a synthetic method similar to that reported for **4a**. Thus, **2a** (0.150 g, 1.52 mmol) was reacted with py (72  $\mu$ l, 7.02 mmol) for 12 h to give **5a** as a yellow solid. Yield: 0.129 g (74.5%). Anal. Calc. for C<sub>26</sub>H<sub>24</sub>ClN<sub>2</sub>O<sub>2</sub>PPd (568.9): C, 54.84; H, 4.20; N, 4.90. Found: C, 54.64; H, 4.68; N, 5.00. IR ( $\nu$ , cm<sup>-1</sup>): 1751 ( $\nu_{\text{CO}}$ ), 1292 ( $\nu_{\text{PN}}$ ). MS (FAB+) [m/z, (%): 534 (40) [M-Cl]<sup>+</sup>, 454 (100) [M-Cl-Py]<sup>+</sup>. <sup>1</sup>H NMR (CDCl<sub>3</sub>):  $\delta$  = 3.47 (s, 3H, OMe), 3.87 (d, 2H, <sup>3</sup>J<sub>PH</sub> = 19.7, CH<sub>2</sub>), 6.13 (d, 1H, <sup>3</sup>J<sub>HH</sub> = 7.0, H<sub>6</sub>, C<sub>6</sub>H<sub>4</sub>), 6.85-6.94 (m, 3H, H<sub>3</sub>, H<sub>4</sub>, H<sub>5</sub>, C<sub>6</sub>H<sub>4</sub>), 7.26 (dt, 2H, <sup>4</sup>J<sub>HH</sub> = 1.5, <sup>3</sup>J<sub>HH</sub> = 6.5, H<sub>m</sub>, py), 7.46 (dt, 4H, <sup>4</sup>J<sub>PH</sub> = 3.0, <sup>3</sup>J<sub>HH</sub> = 7.3, H<sub>m</sub>, PPh<sub>2</sub>), 7.56 (m, 2H, H<sub>p</sub>, PPh<sub>2</sub>), 7.71 (tt, 1H, <sup>3</sup>J<sub>HH</sub> = 7.5, <sup>4</sup>J<sub>HH</sub> = 1.5, H<sub>p</sub>, py), 7.76 (ddd, 4H, <sup>3</sup>J<sub>HH</sub> = 7.0, <sup>4</sup>J<sub>HH</sub> = 1.2, <sup>3</sup>J<sub>PH</sub> = 8.3, H<sub>o</sub>, PPh<sub>2</sub>), 8.84 (dd, 2 H, <sup>4</sup>J<sub>HH</sub> = 1.5, <sup>3</sup>J<sub>HH</sub> = 6.3 Hz, H<sub>o</sub>, py). <sup>13</sup>C{<sup>1</sup>H} NMR (CDCl<sub>3</sub>):  $\delta$  = 48.46 (CH<sub>2</sub>), 51.53 (OMe), 123.89 (d, J<sub>PC</sub> = 14.0, C<sub>6</sub>H<sub>4</sub>), 125.05 (C<sub>m</sub>, py), 127.25 (d, <sup>1</sup>J<sub>PC</sub> = 99.1, C<sub>i</sub>, PPh<sub>2</sub>), 128.20 (d, J<sub>PC</sub> = 21.0, C<sub>6</sub>H<sub>4</sub>), 128.98 (d, <sup>3</sup>J<sub>PC</sub> = 11.6, C<sub>m</sub>, PPh<sub>2</sub>), 130.51 (d, J<sub>PC</sub> = 2.8, C<sub>6</sub>H<sub>4</sub>), 132.79 (d, <sup>4</sup>J<sub>PC</sub> = 2.4, C<sub>p</sub>, PPh<sub>2</sub>), 133.08 (d, <sup>2</sup>J<sub>PC</sub> = 12.5, C<sub>o</sub>, PPh<sub>2</sub>), 134.56 (d, <sup>3</sup>J<sub>PC</sub> = 15.3, C<sub>6</sub>, C<sub>6</sub>H<sub>4</sub>), 137.36 (C<sub>p</sub>, py), 139.77 (d, <sup>1</sup>J<sub>PC</sub> = 139.8, C<sub>2</sub>, C<sub>6</sub>H<sub>4</sub>), 153.69 (C<sub>o</sub>, py), 155.50 (d, <sup>2</sup>J<sub>PC</sub> = 22.7, C<sub>1</sub>, C<sub>6</sub>H<sub>4</sub>), 173.45 (d, <sup>3</sup>J<sub>PC</sub> = 8.9, CO). <sup>31</sup>P{<sup>1</sup>H} NMR (CDCl<sub>3</sub>):  $\delta$  = 56.10.

**Synthesis of [Pd{C<sub>6</sub>H<sub>4</sub>(PPh<sub>2</sub>=NCH<sub>2</sub>COOMe)-C,N,O}-2}(PPh<sub>3</sub>)](ClO<sub>4</sub>) (6a).** *Method A.* A solution of **4a** (0.130 g, 1.77 mmol) in dry THF (20 mL) was treated with AgClO<sub>4</sub> (0.036 g, 1.77 mmol), and the resulting suspension was stirred with exclusion of light for 1 h. After the reaction time the insoluble AgCl was filtered over Celite, and the resulting yellow solution was evaporated to dryness. By Et<sub>2</sub>O addition (25 mL) and further stirring, complex **6a** was obtained as a yellow solid. Yield: 0.112 g (77.5%). *Method B.* To a solution of **2a** (0.150 g, 0.15 mmol) in THF (20 mL), AgClO<sub>4</sub> (0.063 g, 0.30 mmol) was added, and the resulting solution was stirred for 30 min at room temperature with exclusion of light. The thus obtained

suspension was filtered, and the resulting solution was treated with PPh<sub>3</sub> (0.08 g, 0.3 mmol) and stirring at 25 °C for 5 h. At the end of the reaction time, the solution was evaporated to dryness and the residue treated with Et<sub>2</sub>O (15 mL). Further stirring gives **6a** as a yellow solid. Yield: 0.188 g (77%). Anal. Calc. for C<sub>39</sub>H<sub>34</sub>ClNO<sub>6</sub>P<sub>2</sub>Pd (816.5): C, 57.36; H, 4.19; N, 1.71. Found: C, 57.33; H, 4.12; N, 1.69. IR (ν, cm<sup>-1</sup>): 1644 (ν<sub>CO</sub>), 1272 (ν<sub>PN</sub>). MS (FAB+) [m/z, (%): 716 (100) [M-ClO<sub>4</sub>]<sup>+</sup>. <sup>1</sup>H NMR (CD<sub>2</sub>Cl<sub>2</sub>): δ = 3.76 (s, 3H, OMe), 4.14 (dd, 2H, <sup>4</sup>J<sub>PH</sub> = 7.2, <sup>3</sup>J<sub>PH</sub> = 2.4, CH<sub>2</sub>), 6.67 (m, 1H, H<sub>6</sub>, C<sub>6</sub>H<sub>4</sub>), 6.78 (m, 1H, H<sub>5</sub>, C<sub>6</sub>H<sub>4</sub>), 6.92-7.03 (m, 2H, H<sub>4</sub>, H<sub>3</sub>, C<sub>6</sub>H<sub>4</sub>), 7.44-7.61 (m, 10H, PPh<sub>2</sub>), 7.64-7.82 (m, 15H, PPh<sub>3</sub>). <sup>13</sup>C {<sup>1</sup>H} NMR (CDCl<sub>3</sub>): δ = 49.27 (CH<sub>2</sub>), 55.09 (s, OMe), 125.31 (d, <sup>3</sup>J<sub>PC</sub> = 14.7, C<sub>4</sub>, C<sub>6</sub>H<sub>4</sub>), 125.85 (d, <sup>1</sup>J<sub>PC</sub> = 86.9, C<sub>i</sub>, PPh<sub>2</sub>), 127.67 (d, <sup>1</sup>J<sub>PC</sub> = 87.4, C<sub>i</sub>, PPh<sub>3</sub>), 128.87 (d, <sup>2</sup>J<sub>PC</sub> = 11.0, C<sub>m</sub>, PPh<sub>3</sub>), 129.87 (d, <sup>2</sup>J<sub>PC</sub> = 11.9, C<sub>m</sub>, PPh<sub>2</sub>), 131.23 (d, <sup>2</sup>J<sub>PC</sub> = 20.4, C<sub>3</sub>, C<sub>6</sub>H<sub>4</sub>), 131.68 (d, <sup>4</sup>J<sub>PC</sub> = 2.1, C<sub>p</sub>, PPh<sub>3</sub>), 131.97 (dd, <sup>4</sup>J<sub>PC</sub> = 3.1, <sup>4</sup>J<sub>PC</sub> = 5.3, C<sub>5</sub>, C<sub>6</sub>H<sub>4</sub>), 132.57 (d, <sup>3</sup>J<sub>PC</sub> = 10.2, C<sub>o</sub>, PPh<sub>2</sub>), 134.08 (d, <sup>4</sup>J<sub>PC</sub> = 2.4, C<sub>p</sub>, PPh<sub>2</sub>), 134.80 (d, <sup>3</sup>J<sub>PC</sub> = 12.3, C<sub>o</sub>, PPh<sub>3</sub>), 140.39 (t, <sup>3</sup>J<sub>PC</sub> = 13.6, C<sub>6</sub>, C<sub>6</sub>H<sub>4</sub>), 141.93 (dd, <sup>1</sup>J<sub>PC</sub> = 139.6, <sup>4</sup>J<sub>PC</sub> = 1.6, C<sub>2</sub>, C<sub>6</sub>H<sub>4</sub>), 147.32 (dd, <sup>2</sup>J<sub>PC</sub> = 15.1, <sup>2</sup>J<sub>PC</sub> = 3.2, C<sub>1</sub>, C<sub>6</sub>H<sub>4</sub>), 186.12 (dd, <sup>3</sup>J<sub>PC</sub> = 23.1, <sup>3</sup>J<sub>PC</sub> = 5.5, CO). <sup>31</sup>P {<sup>1</sup>H} NMR (CD<sub>2</sub>Cl<sub>2</sub>): δ = 39.29 (PPh<sub>3</sub>), 47.55 (C<sub>6</sub>H<sub>4</sub>PPh<sub>2</sub>).

**Synthesis of [Pd{C<sub>6</sub>H<sub>4</sub>(PPh<sub>2</sub>=NCH<sub>2</sub>COOMe)-C,N,O-2}(py)](ClO<sub>4</sub>) (**7a**).** Complex **7a** was prepared following the same synthetic method than that reported for **6a**, method A. Thus, **5a** (0.086 g, 1.52 mmol) was reacted with AgClO<sub>4</sub> (0.031 g, 1.52 mmol) in THF (20 mL) to give **7a** as a yellow solid. Yield: 0.044 g (29.3%). Anal. Calc. for C<sub>26</sub>H<sub>24</sub>ClN<sub>2</sub>O<sub>6</sub>PPd (633.3): C, 49.30; H, 3.81; N, 4.42. Found: C, 49.48; H, 3.61; N, 4.39. IR (ν, cm<sup>-1</sup>): 1652 (ν<sub>CO</sub>), 1264 (ν<sub>PN</sub>). MS (FAB+) [m/z, (%): 533 (90) [M-ClO<sub>4</sub>]<sup>+</sup>. <sup>1</sup>H NMR (CD<sub>2</sub>Cl<sub>2</sub>): δ = 3.85 (s, 3H, OMe), 4.00 (d, 2H, <sup>3</sup>J<sub>PH</sub> = 6.9, CH<sub>2</sub>), 6.38 (td, 1H, <sup>3</sup>J<sub>HH</sub> = 4.1, <sup>4</sup>J<sub>HH</sub> = 1.2, H<sub>6</sub>, C<sub>6</sub>H<sub>4</sub>), 6.89-6.99 (m, 1H, H<sub>5</sub>, C<sub>6</sub>H<sub>4</sub>), 7.08-7.15 (m, 2H, H<sub>3</sub>, H<sub>4</sub>, C<sub>6</sub>H<sub>4</sub>), 7.60-7.80 (m, 12H, 10H (PPh<sub>2</sub>) + 2H<sub>m</sub> (py)), 8.07 (tt, 1H, <sup>4</sup>J<sub>HH</sub> = 1.5, <sup>3</sup>J<sub>HH</sub> = 7.7, H<sub>p</sub>, py), 8.90 (td, 1H, <sup>4</sup>J<sub>HH</sub> = 1.5, <sup>3</sup>J<sub>HH</sub> = 4.8, H<sub>o</sub>, py). <sup>13</sup>C {<sup>1</sup>H} NMR (CDCl<sub>3</sub>): δ = 49.12 (CH<sub>2</sub>), 55.11 (OMe), 125.57 (d, <sup>1</sup>J<sub>PC</sub> = 86.8, C<sub>i</sub>, PPh<sub>2</sub>),

125.44 (d,  $J_{PC} = 14.7$ , C<sub>6</sub>H<sub>4</sub>), 126.48 (C<sub>m</sub>, py), 129.80 (d,  $^3J_{PC} = 11.9$ , C<sub>m</sub>, PPh<sub>2</sub>), 130.27 (d,  $^2J_{PC} = 20.9$ , C<sub>5</sub>, C<sub>6</sub>H<sub>4</sub>), 132.11 (d,  $^4J_{PC} = 2.8$ , C<sub>6</sub>H<sub>4</sub>), 132.60 (d,  $^2J_{PC} = 10.3$ , C<sub>o</sub>, PPh<sub>2</sub>), 134.00 (d,  $^4J_{PC} = 2.5$ , C<sub>p</sub>, PPh<sub>2</sub>), 134.53 (d,  $^3J_{PC} = 13.4$ , C<sub>6</sub>, C<sub>6</sub>H<sub>4</sub>), 139.31 (C<sub>p</sub>, py), 139.96 (d,  $^1J_{PC} = 140.6$ , C<sub>2</sub>, C<sub>6</sub>H<sub>4</sub>), 146.77 (d,  $^2J_{PC} = 16.1$ , C<sub>1</sub>, C<sub>6</sub>H<sub>4</sub>), 152.72 (C<sub>o</sub>, py), 184.59 (d,  $^3J_{PC} = 5.8$ , CO).  $^{31}\text{P}\{^1\text{H}\}$  NMR (CD<sub>2</sub>Cl<sub>2</sub>):  $\delta = 53.13$ .

**Synthesis of [Pd{C<sub>6</sub>H<sub>4</sub>(PPh<sub>2</sub>=NCH<sub>2</sub>CONMe<sub>2</sub>)-C,N,O-2}(NCMe)](ClO<sub>4</sub>) (3b).** Complex **3b** was prepared following a synthetic method similar to that reported for **3a**. Thus, **2b** (0.100 g, 0.97 mmol) was reacted with AgClO<sub>4</sub> (0.040 g, 1.94 mmol) in NCMe (10 mL) to give **3b** as a white solid. Yield: 0.102 g (79.4%). Anal. Calc. for C<sub>24</sub>H<sub>25</sub>ClN<sub>3</sub>O<sub>5</sub>PPd (608.1): C, 47.36; H, 4.14; N, 6.91. Found: C, 47.27; H, 4.50; N, 6.53. IR (ν, cm<sup>-1</sup>): 2326, 2293 (ν<sub>CN</sub>), 1609 (ν<sub>C=O</sub>), 1259 (ν<sub>P=N</sub>). MS (FAB+) [m/z, (%): 467 (100) [M - NCMe - ClO<sub>4</sub>]<sup>+</sup>.  $^1\text{H}$  NMR (CD<sub>2</sub>Cl<sub>2</sub>):  $\delta = 2.51$  (s, 3H, NCMe), 2.93 (s, 3H, NMe), 3.00 (s, 3H, NMe), 3.95 (d, 2H,  $^3J_{PH} = 6.8$ , CH<sub>2</sub>), 6.92 (ddd, 1H,  $^3J_{HH} = 7.2$ ,  $^4J_{HH} = 1.2$ ,  $^4J_{PH} = 11.2$ , H<sub>6</sub>, C<sub>6</sub>H<sub>4</sub>), 7.13-7.18 (m, 1H, H<sub>5</sub>, C<sub>6</sub>H<sub>4</sub>), 7.24-7.31 (m, 2H, H<sub>3</sub>, H<sub>4</sub>, C<sub>6</sub>H<sub>4</sub>), 7.66-7.71 (m, 4H, H<sub>m</sub>, PPh<sub>2</sub>), 7.74-7.80 (m, 6H, 4H<sub>o</sub>+2H<sub>p</sub>, PPh<sub>2</sub>).  $^{13}\text{C}\{^1\text{H}\}$  NMR (CD<sub>2</sub>Cl<sub>2</sub>):  $\delta = 3.59$  (NCMe), 36.04 (NMe), 38.22 (NMe), 49.55 (NCH<sub>2</sub>), 119.25 (NC), 125.18 (d,  $^1J_{PC} = 89.6$ , C<sub>i</sub>, PPh<sub>2</sub>), 125.49 (d,  $^4J_{PC} = 5.1$ , C<sub>5</sub>, C<sub>6</sub>H<sub>4</sub>), 129.76 (d,  $^3J_{PC} = 12.3$ , C<sub>m</sub>, PPh<sub>2</sub>), 130.31 (d,  $^3J_{PC} = 20.6$ , C<sub>6</sub>, C<sub>6</sub>H<sub>4</sub>), 132.05 (d,  $^3J_{PC} = 2.1$ , C<sub>4</sub>, C<sub>6</sub>H<sub>4</sub>), 132.63 (d,  $^2J_{PC} = 10.3$ , C<sub>o</sub>, PPh<sub>2</sub>), 134.05 (d,  $^3J_{PC} = 2.1$ , C<sub>p</sub>, PPh<sub>2</sub>), 135.67 (d,  $^2J_{PC} = 13.3$ , C<sub>3</sub>, C<sub>6</sub>H<sub>4</sub>), 141.12 (d,  $^1J_{PC} = 144.2$ , C<sub>2</sub>, C<sub>6</sub>H<sub>4</sub>), 147.24 (d,  $^2J_{PC} = 16.4$ , C<sub>1</sub>, C<sub>6</sub>H<sub>4</sub>), 180.51 (d,  $^3J_{PC} = 18.5$ , CO).  $^{31}\text{P}\{^1\text{H}\}$  NMR (CD<sub>2</sub>Cl<sub>2</sub>):  $\delta = 55.23$ .

**Synthesis of [Pd{C<sub>6</sub>H<sub>4</sub>(PPh<sub>2</sub>=NCH<sub>2</sub>CONMe<sub>2</sub>)-C,N,O-2}(PPh<sub>3</sub>)](ClO<sub>4</sub>) (6b).** To a solution of **3b** (0.040 g, 0.061 mmol) in CH<sub>2</sub>Cl<sub>2</sub> (15 mL), PPh<sub>3</sub> (0.020 g, 0.061 mmol) was added. The resulting solution was stirred for 40 min at 25 °C, then evaporated to dryness. By Et<sub>2</sub>O (25 mL) addition to the oily residue and further stirring, **6b** was obtained as yellow solid. The yield was quantitative (0.044 g). Anal. Calc. for C<sub>40</sub>H<sub>37</sub>ClN<sub>2</sub>O<sub>5</sub>P<sub>2</sub>Pd (829.5): C,

57.92; H, 4.50; N, 3.38. Found: C, 57.81; H, 4.78; N, 3.70. IR ( $\nu$ ,  $\text{cm}^{-1}$ ): 1602 ( $\nu_{\text{C=O}}$ ), 1257 ( $\nu_{\text{P=N}}$ ). MS (FAB+) [ $m/z$ , (%): 729 (100) [ $\text{M} - \text{ClO}_4$ ] $^+$ .  $^1\text{H}$  NMR ( $\text{CD}_2\text{Cl}_2$ ):  $\delta$  = 2.36 (s, 3H, NMe), 2.75 (s, 3H, NMe), 4.04 (dd, 2H,  $^4J_{\text{PH}} = 1.3$ ,  $^3J_{\text{PH}} = 7.4$ ,  $\text{CH}_2$ ), 6.56 (m, 1H,  $\text{H}_6$ ,  $\text{C}_6\text{H}_4$ ), 6.66 (m, 1H,  $\text{C}_6\text{H}_4$ ), 6.81-6.88 (m, 2H,  $\text{C}_6\text{H}_4$ ), 7.37 (m, 6H,  $\text{H}_m$ ,  $\text{PPh}_3$ ), 7.45 (m, 3H,  $\text{H}_p$ ,  $\text{PPh}_3$ ), 7.60 (m, 6H,  $\text{H}_o$ ,  $\text{PPh}_3$ ), 7.64-7.72 (m, 10H,  $\text{PPh}_2$ ).  $^{13}\text{C}\{^1\text{H}\}$  NMR ( $\text{CDCl}_3$ ):  $\delta$  = 36.38 (NMe), 38.45 (NMe), 49.67 (d,  $^2J_{\text{PC}} = 1.4$ ,  $\text{NCH}_2$ ), 124.69 (d,  $J_{\text{PC}} = 14.7$ ,  $\text{C}_6\text{H}_4$ ), 126.32 (d,  $^1J_{\text{PC}} = 86.2$ ,  $\text{C}_i$ ,  $\text{PPh}_2$ ), 128.70 (d,  $^3J_{\text{PC}} = 10.8$ ,  $\text{C}_m$ ,  $\text{PPh}_3$ ), 129.41 (d,  $^1J_{\text{PC}} = 49.1$ ,  $\text{C}_i$ ,  $\text{PPh}_3$ ), 129.80 (d,  $^2J_{\text{PC}} = 11.8$ ,  $\text{C}_o$ ,  $\text{PPh}_3$ ), 130.94 (d,  $J_{\text{PC}} = 20.8$ ,  $\text{C}_6\text{H}_4$ ), 131.37 (d,  $^4J_{\text{PC}} = 2.3$ ,  $\text{C}_p$ ,  $\text{PPh}_3$ ), 131.48 (d,  $J_{\text{PC}} = 5.1$ ,  $\text{C}_6\text{H}_4$ ), 132.78 (d,  $^3J_{\text{PC}} = 10.1$ ,  $\text{C}_m$ ,  $\text{PPh}_2$ ), 133.81 (d,  $^4J_{\text{PC}} = 2.7$ ,  $\text{C}_p$ ,  $\text{PPh}_2$ ), 134.93 (d,  $^2J_{\text{PC}} = 12.2$ ,  $\text{C}_o$ ,  $\text{PPh}_2$ ), 140.54 (t,  $J_{\text{PC}} = 26.7$ ,  $\text{C}_6\text{H}_4$ ), 143.25 (dd,  $^3J_{\text{PC}} = 10.4$ ,  $^1J_{\text{PC}} = 131.0$ ,  $\text{C}_2$ ,  $\text{C}_6\text{H}_4$ ), 150.26 (dd,  $^2J_{\text{PC}} = 5.0$ ,  $^2J_{\text{PC}} = 16.3$ ,  $\text{C}_1$ ,  $\text{C}_6\text{H}_4$ ), 181.85 (dd,  $^3J_{\text{PC}} = 5.5$ ,  $^3J_{\text{PC}} = 19.8$ ,  $\text{CO}$ ).  $^{31}\text{P}\{^1\text{H}\}$  NMR ( $\text{CD}_2\text{Cl}_2$ ):  $\delta$  = 38.91 (d,  $^3J_{\text{PP}} = 5.2$ ,  $\text{PPh}_3$ ), 46.31 (d,  $\text{PPh}_2\text{N}$ ).

**Synthesis of  $[\text{Pd}\{\text{C}_6\text{H}_4(\text{PPh}_2=\text{NCH}_2\text{CONMe}_2\text{-C}_i\text{-N,O-2}\}\text{(py)})(\text{ClO}_4)$  (**7b**).** Complex **7b** was prepared through a synthetic procedure similar to that described for **6b**. Thus, **3b** (0.040 g, 0.061 mmol) was reacted with py (5.19  $\mu\text{L}$ , 0.061 mmol) in  $\text{CH}_2\text{Cl}_2$  (10 mL) to give **7b** as a yellow solid. Yield: 0.031 g (90.6%). Anal. Calc. for  $\text{C}_{27}\text{H}_{27}\text{ClN}_3\text{O}_5\text{PPd}$  (646.10): C, 50.15; H, 4.21; N, 6.50. Found: C, 49.80; H, 4.26; N, 6.13. IR ( $\nu$ ,  $\text{cm}^{-1}$ ): 1607 ( $\nu_{\text{C=O}}$ ), 1259 ( $\nu_{\text{P=N}}$ ). MS (FAB+) [ $m/z$ , (%): 546 (75) [ $\text{M}-\text{ClO}_4$ ] $^+$ , 467 (100) [ $\text{M}-\text{py}-\text{ClO}_4$ ] $^+$ .  $^1\text{H}$  NMR ( $\text{CD}_2\text{Cl}_2$ ):  $\delta$  = 2.82 (s, 3H, NMe), 2.83 (s, 3H, NMe), 3.91 (d, 2H,  $^3J_{\text{PH}} = 6.8$ ,  $\text{CH}_2$ ), 6.39 (m, 1H,  $\text{H}_6$ ,  $\text{C}_6\text{H}_4$ ), 6.84 (m, 1H,  $\text{H}_5$ ,  $\text{C}_6\text{H}_4$ ), 6.97-7.05 (m, 2H,  $\text{H}_3$ ,  $\text{H}_4$ ,  $\text{C}_6\text{H}_4$ ), 7.50 (m, 2H,  $\text{H}_m$ , py), 7.58 (m, 4H,  $\text{H}_m$ ,  $\text{PPh}_2$ ), 7.67-7.72 (m, 6H,  $4\text{H}_o+2\text{H}_p$ ,  $\text{PPh}_2$ ), 7.94 (tt, 1H,  $^3J_{\text{HH}} = 7.7$ ,  $^4J_{\text{HH}} = 1.5$ ,  $\text{H}_p$ , py), 8.79 (dd, 2 H,  $^3J_{\text{HH}} = 6.3$ ,  $^4J_{\text{HH}} = 1.3$ ,  $\text{H}_o$ , py).  $^{13}\text{C}\{^1\text{H}\}$  NMR ( $\text{CD}_2\text{Cl}_2$ ):  $\delta$  = 35.84 (NMe), 37.99 (NMe), 49.39 ( $\text{NCH}_2$ ), 124.88 (d,  $^2J_{\text{PC}} = 14.8$ ,  $\text{C}_3$ ,  $\text{C}_6\text{H}_4$ ), 125.62 (d,  $^1J_{\text{PC}} = 86.1$ ,  $\text{C}_i$ ,  $\text{PPh}_2$ ), 126.00 ( $\text{C}_m$ , py), 129.54 (d,  $^3J_{\text{PC}} = 11.8$ ,  $\text{C}_m$ ,  $\text{PPh}_2$ ), 130.16 (d,  $^4J_{\text{PC}} = 21.2$ ,  $\text{C}_5$ ,  $\text{C}_6\text{H}_4$ ), 131.68 (d,  $^3J_{\text{PC}} = 3.1$ ,  $\text{C}_4$ ,  $\text{C}_6\text{H}_4$ ), 132.51 (d,  $^2J_{\text{PC}} = 10.2$ ,  $\text{C}_o$ ,  $\text{PPh}_2$ ), 133.72 (d,  $^4J_{\text{PC}} = 2.8$ ,  $\text{C}_p$ ,

PPh<sub>2</sub>), 134.30 (d, <sup>3</sup>J<sub>PC</sub> = 13.7, C<sub>6</sub>, C<sub>6</sub>H<sub>4</sub>), 138.85 (C<sub>p</sub>, py), 141.84 (d, <sup>1</sup>J<sub>PC</sub> = 139.5, C<sub>2</sub>, C<sub>6</sub>H<sub>4</sub>), 149.77 (d, <sup>2</sup>J<sub>PC</sub> = 17.0, C<sub>1</sub>, C<sub>6</sub>H<sub>4</sub>), 152.42 (C<sub>o</sub>, py), 180.54 (d, <sup>3</sup>J<sub>PC</sub> = 18.1, CO). <sup>31</sup>P{<sup>1</sup>H} NMR (CD<sub>2</sub>Cl<sub>2</sub>): δ = 51.41.

**Synthesis of [Pd{C<sub>6</sub>H<sub>4</sub>(PPh<sub>2</sub>=NCH<sub>2</sub>CH<sub>2</sub>SMe)-C,N,S}-2}(NCMe)](ClO<sub>4</sub>) (3c).** Complex **3c** was prepared following a synthetic method similar to that reported for **3a**. Thus, **2c** (0.200 g, 2.30 mmol) was reacted with AgClO<sub>4</sub> (0.046 g, 2.30 mmol) in NCMe (10 mL) to give **3c** as a yellow solid. Yield: 0.166 g (67.1%). Anal. Calc. for C<sub>23</sub>H<sub>24</sub>ClO<sub>4</sub>N<sub>2</sub>PPdS (597.4): C, 46.20; H, 4.04; N, 4.68; S, 5.30. Found: C, 46.00; H, 3.91; N, 4.61; S, 6.00. IR (ν, cm<sup>-1</sup>): 2324, 2293 (ν<sub>CN</sub>), 1230 (ν<sub>P=N</sub>). MS (FAB<sup>+</sup>) [m/z, (%): 497 (100) [M - ClO<sub>4</sub>]<sup>+</sup>. <sup>1</sup>H NMR (DMSO-d<sub>6</sub>): δ = 2.07 (s, 3H, NCMe), 2.46 (s, 3H, SMe), 3.04 (t, 2H, <sup>3</sup>J<sub>HH</sub> = 5.2, SCH<sub>2</sub>), 3.26 (m, 2H, NCH<sub>2</sub>), 7.17-7.28 (m, 2H, H<sub>3</sub>, H<sub>4</sub>, C<sub>6</sub>H<sub>4</sub>), 7.42 (t, 1H, <sup>3</sup>J<sub>HH</sub> = 8.0, H<sub>5</sub>, C<sub>6</sub>H<sub>4</sub>), 7.67-7.82 (m, 10H, PPh<sub>2</sub>), 7.94 (dd, 1H, <sup>3</sup>J<sub>HH</sub> = 8.0, <sup>4</sup>J<sub>HH</sub> = 1.6, H<sub>6</sub>, C<sub>6</sub>H<sub>4</sub>). <sup>13</sup>C{<sup>1</sup>H} NMR (DMSO-d<sub>6</sub>): δ = 0.02 (NCMe), 14.38 (SMe), 39.56 (d, <sup>2</sup>J<sub>PC</sub> = 15.2, CH<sub>2</sub>S), 44.08 (CH<sub>2</sub>N), 116.99 (NC), 124.84 (d, <sup>1</sup>J<sub>PC</sub> = 86.0, C<sub>i</sub>, PPh<sub>2</sub>), 125.29 (d, J<sub>PC</sub> = 13.5, C<sub>6</sub>H<sub>4</sub>), 128.60 (d, <sup>3</sup>J<sub>PC</sub> = 11.7, C<sub>m</sub>, PPh<sub>2</sub>), 129.58 (d, J<sub>PC</sub> = 21.0, C<sub>6</sub>H<sub>4</sub>), 131.34 (d, <sup>2</sup>J<sub>PC</sub> = 10.2, C<sub>o</sub>, PPh<sub>2</sub>), 132.71 (d, <sup>4</sup>J<sub>PC</sub> = 1.7, C<sub>p</sub>, PPh<sub>2</sub>), 133.51 (d, J<sub>PC</sub> = 14.7, C<sub>6</sub>H<sub>4</sub>), 140.81 (d, <sup>1</sup>J<sub>PC</sub> = 135.6, C<sub>2</sub>, C<sub>6</sub>H<sub>4</sub>), 156.04 (d, <sup>2</sup>J<sub>PC</sub> = 20.8, C<sub>1</sub>, C<sub>6</sub>H<sub>4</sub>). <sup>31</sup>P{<sup>1</sup>H} NMR (DMSO-d<sub>6</sub>): δ = 54.27.

**Synthesis of [Pd{C<sub>6</sub>H<sub>4</sub>(PPh<sub>2</sub>=NCH<sub>2</sub>CH<sub>2</sub>SMe)-C,N,S}-2}(py)](ClO<sub>4</sub>) (7c).** Complex **7c** was prepared through a synthetic procedure similar to that described for **6b**. Thus, **3c** (0.075 g, 0.14 mmol) was reacted with a large excess of py (68 μl, 1.68 mmol) in CH<sub>2</sub>Cl<sub>2</sub> (10 mL) to give **7c** as a yellow solid. Yield: 0.066 g (99.3%). Anal. Calc. for C<sub>26</sub>H<sub>26</sub>ClO<sub>4</sub>N<sub>2</sub>PPdS (635.1): C, 49.13; H, 4.12; N, 4.41. Found: C, 48.70; H, 3.47; N, 4.86. IR (ν, cm<sup>-1</sup>): 1604 (ν<sub>C=O</sub>), 1221 (ν<sub>P=N</sub>). MS (FAB<sup>+</sup>) [m/z, (%): 534 (75) [M - ClO<sub>4</sub>]<sup>+</sup>, 456 (100) [M-ClO<sub>4</sub> - py]<sup>+</sup>. <sup>1</sup>H NMR (CD<sub>2</sub>Cl<sub>2</sub>): δ = 2.48 (s, 3H, SMe), 3.19 (m, 2H, SCH<sub>2</sub>), 3.33 (m, 2H, NCH<sub>2</sub>), 6.45 (m, 1H, H<sub>6</sub>, C<sub>6</sub>H<sub>4</sub>), 7.21 (m, 1H, C<sub>6</sub>H<sub>4</sub>), 7.30-7.34 (m, 2H, C<sub>6</sub>H<sub>4</sub>), 7.72 (m, 4H, H<sub>m</sub>, PPh<sub>2</sub>), 7.84 (m, 2H,

H<sub>p</sub>, PPh<sub>2</sub>), 7.91-7.97 (m, 6H, 4H<sub>o</sub> (PPh<sub>2</sub>) + 2H<sub>m</sub> (py)), 8.25 (tt, 1H, <sup>3</sup>J<sub>HH</sub> = 7.7, <sup>4</sup>J<sub>HH</sub> = 1.5, H<sub>p</sub>, py), 9.06 (dd, 2H, <sup>3</sup>J<sub>HH</sub> = 6.3, <sup>4</sup>J<sub>HH</sub> = 1.5, H<sub>o</sub>, py). <sup>13</sup>C{<sup>1</sup>H} NMR (CDCl<sub>3</sub>): δ = 17.41 (SMe), 42.34 (d, <sup>2</sup>J<sub>PC</sub> = 16.9, CH<sub>2</sub>S), 46.12 (CH<sub>2</sub>N), 126.40 (d, <sup>3</sup>J<sub>PC</sub> = 14.7, C<sub>6</sub>, C<sub>6</sub>H<sub>4</sub>), 127.19 (s, C<sub>i</sub>, PPh<sub>2</sub>), 128.38 (d, <sup>3</sup>J<sub>PC</sub> = 10.9, C<sub>m</sub>, PPh<sub>2</sub>), 130.63 (d, J<sub>PC</sub> = 21.2, C<sub>6</sub>H<sub>4</sub>), 132.86 (d, J<sub>PC</sub> = 3.1, C<sub>6</sub>H<sub>4</sub>), 133.28 (d, <sup>2</sup>J<sub>PC</sub> = 10.0, C<sub>o</sub>, PPh<sub>2</sub>), 134.34 (d, <sup>3</sup>J<sub>PC</sub> = 16.9, C<sub>6</sub>, C<sub>6</sub>H<sub>4</sub>), 134.47 (d, <sup>4</sup>J<sub>PC</sub> = 2.6, C<sub>p</sub>, PPh<sub>2</sub>), 141.93 (d, <sup>1</sup>J<sub>PC</sub> = 138.3, C<sub>2</sub>, C<sub>6</sub>H<sub>4</sub>), 153.30 (C<sub>o</sub>, py), 157.52 (d, <sup>2</sup>J<sub>PC</sub> = 20.6, C<sub>1</sub>, C<sub>6</sub>H<sub>4</sub>). <sup>31</sup>P{<sup>1</sup>H} NMR (CD<sub>2</sub>Cl<sub>2</sub>): δ = 53.96.

**Synthesis of [Pd(Ph<sub>3</sub>P=NCH<sub>2</sub>CH<sub>2</sub>SMe)-N,S)(Cl)<sub>2</sub>] (8).** To a solution of **1c** (0.538 g, 1.53 mmol) in CH<sub>2</sub>Cl<sub>2</sub> (15 mL), Pd(OAc)<sub>2</sub> (0.307 g, 1.53 mmol) was added, and the resulting mixture was refluxed for 1 h. After the reaction time, the red solution was evaporated to dryness, and the deep red residue was dissolved in MeOH (10 mL). The treatment of this solution with an excess of anhydrous LiCl (0.232 g, 5.48 mmol) and gentle stirring for 12 h at 25 °C, gives **8** as a yellow solid, which was filtered, washed with MeOH (5 mL) and Et<sub>2</sub>O (50 ml) and dried by suction. Yield: 0.612 g (75.7%). Anal. Calc. for C<sub>21</sub>H<sub>22</sub>Cl<sub>2</sub>NPPdS (528.3): C, 47.70; H, 4.19; N, 2.65. Found: C, 47.83; H, 4.39; N, 2.77. IR (ν, cm<sup>-1</sup>): 1232 (ν<sub>P=N</sub>). MS (FAB+) [m/z, (%): 492 (27) [M - Cl]<sup>+</sup>. <sup>1</sup>H NMR (CD<sub>2</sub>Cl<sub>2</sub>): δ = 1.79 (s, 3H, SMe), 2.09 (m, 1H, SCH<sub>2</sub>), 2.40 (m, 1H, SCH<sub>2</sub>), 2.66 (m, 1H, NCH<sub>2</sub>), 3.16 (m, 1H, NCH<sub>2</sub>), 7.36-7.39 (m, 6H, H<sub>m</sub>, PPh<sub>3</sub>), 7.43-7.46 (m, 3H, H<sub>p</sub>, PPh<sub>3</sub>), 7.62-7.67 (m, 6H, H<sub>o</sub>, PPh<sub>3</sub>). <sup>13</sup>C{<sup>1</sup>H} NMR (CD<sub>2</sub>Cl<sub>2</sub>): δ = 21.97 (SMe), 41.14 (d, <sup>3</sup>J<sub>PC</sub> = 11.4, SCH<sub>2</sub>), 53.13 (NCH<sub>2</sub>), 127.21 (d, <sup>1</sup>J<sub>PC</sub> = 102.4, C<sub>i</sub>, PPh<sub>3</sub>), 129.02 (s, <sup>3</sup>J<sub>PC</sub> = 12.5, C<sub>m</sub>, PPh<sub>3</sub>), 133.24 (d, <sup>4</sup>J<sub>PC</sub> = 2.8, C<sub>p</sub>, PPh<sub>3</sub>), 134.16 (d, <sup>2</sup>J<sub>PC</sub> = 9.6, C<sub>o</sub>, PPh<sub>3</sub>). <sup>31</sup>P{<sup>1</sup>H} NMR (CD<sub>2</sub>Cl<sub>2</sub>): δ = 37.54.

**Crystal Structure Determination and Data Collection of Complexes 2a·2CHCl<sub>3</sub>, 3b, 7b and 8.** Crystals of adequate quality for X-ray measurements were grown by vapour diffusion of Et<sub>2</sub>O into CH<sub>2</sub>Cl<sub>2</sub> (**3b**, **7b**) or CHCl<sub>3</sub> solutions (**2a**, **8**) of the corresponding crude products at room temperature. A single crystal of each compound (dimensions specified in Table 1)

was mounted at the end of a quartz fiber in a random orientation, covered with magic oil and placed under the cold stream of nitrogen. Data collection was performed at 100 K or 123 K (see Table 1) on Bruker Smart CCD or Oxford Diffraction Xcalibur2 diffractometers using graphite-monochromated Mo-K $\alpha$  radiation ( $\lambda = 0.71073 \text{ \AA}$ ). In all cases an hemisphere of data was collected based on three  $\omega$ -scan or  $\phi$ -scan runs. The diffraction frames were integrated using the programs SAINT<sup>2</sup> or CrysAlis RED<sup>3</sup> and the integrated intensities were corrected for absorption with SADABS.<sup>4</sup>

**Structure Solution and Refinement.** The structures were solved and developed by direct or Patterson methods.<sup>5</sup> All non-hydrogen atoms were refined with anisotropic displacement parameters. The hydrogen atoms were placed at idealized positions and treated as riding atoms. Each hydrogen atom was assigned an isotropic displacement parameter equal to 1.2 times the equivalent isotropic displacement parameter of its parent atom. The structures were refined to  $F_o^2$ , and all reflections were used in the least-squares calculations.<sup>6</sup>

- (1) Bräse, S.; Gil, C.; Knepper, K.; Zimmermann, V. *Angew. Chem. Int. Ed.* **2005**, *44*, 5188.
- (2) SAINT Version 5.0: Bruker Analytical X-ray Systems, Madison, WI.
- (3) CrysAlis RED, Oxford Diffraction Ltd., Version 1.171.27p8, 2005.
- (4) Sheldrick, G. M. SADABS: Empirical absorption correction program, Göttingen University, **1996**.
- (5) Sheldrick, G.M. SHELXS-86, *Acta Crystallogr.* **1990**, *A46*, 467.
- (6) Sheldrick, G.M. SHELXL-97: FORTRAN program for the refinement of crystal structures from diffraction data. Göttingen University, **1997**. Molecular graphics were done using the commercial package SHELXTL-PLUS, Release 5.05/V: © **1996**, Siemens Analytical X-ray Instruments, Inc., Madison, Wisconsin.

Table S1. Crystal data and structure refinement for **2a.2CHCl<sub>3</sub>**.

|                                   |                                                                                                              |                   |
|-----------------------------------|--------------------------------------------------------------------------------------------------------------|-------------------|
| Empirical formula                 | C <sub>44</sub> H <sub>40</sub> Cl <sub>8</sub> N <sub>2</sub> O <sub>4</sub> P <sub>2</sub> Pd <sub>2</sub> |                   |
| Formula weight                    | 1219.12                                                                                                      |                   |
| Temperature                       | 123(1) K                                                                                                     |                   |
| Wavelength                        | 0.71073 Å                                                                                                    |                   |
| Crystal system                    | Monoclinic                                                                                                   |                   |
| Space group                       | P 2 <sub>1</sub> /n                                                                                          |                   |
| Unit cell dimensions              | a = 11.9958(2) Å                                                                                             | α = 90°.          |
|                                   | b = 13.5663(3) Å                                                                                             | β = 99.8661(14)°. |
|                                   | c = 14.8552(2) Å                                                                                             | γ = 90°.          |
| Volume                            | 2381.76(7) Å <sup>3</sup>                                                                                    |                   |
| Z                                 | 2                                                                                                            |                   |
| Density (calculated)              | 1.700 Mg/m <sup>3</sup>                                                                                      |                   |
| Absorption coefficient            | 1.315 mm <sup>-1</sup>                                                                                       |                   |
| F(000)                            | 1216                                                                                                         |                   |
| Crystal size                      | 0.24 x 0.23 x 0.11 mm <sup>3</sup>                                                                           |                   |
| Theta range for data collection   | 4.10 to 27.49°.                                                                                              |                   |
| Index ranges                      | -15 ≤ h ≤ 15, -15 ≤ k ≤ 17, -19 ≤ l ≤ 19                                                                     |                   |
| Reflections collected             | 29116                                                                                                        |                   |
| Independent reflections           | 5463 [R(int) = 0.0337]                                                                                       |                   |
| Completeness to theta = 27.49°    | 99.6 %                                                                                                       |                   |
| Absorption correction             | Semi-empirical from equivalents                                                                              |                   |
| Max. and min. transmission        | 0.8653 and 0.7042                                                                                            |                   |
| Refinement method                 | Full-matrix least-squares on F <sup>2</sup>                                                                  |                   |
| Data / restraints / parameters    | 5463 / 42 / 309                                                                                              |                   |
| Goodness-of-fit on F <sup>2</sup> | 1.139                                                                                                        |                   |
| Final R indices [I > 2σ(I)]       | R1 = 0.0456, wR2 = 0.0912                                                                                    |                   |
| R indices (all data)              | R1 = 0.0576, wR2 = 0.0950                                                                                    |                   |
| Largest diff. peak and hole       | 1.296 and -0.876 e.Å <sup>-3</sup>                                                                           |                   |



Table S2. Atomic coordinates ( $\times 10^4$ ) and equivalent isotropic displacement parameters ( $\text{\AA}^2 \times 10^3$ ) for **2a.2CHCl<sub>3</sub>**.  $U(\text{eq})$  is defined as one third of the trace of the orthogonalized  $U^{\text{ij}}$  tensor.

|        | x       | y        | z       | U(eq)  |
|--------|---------|----------|---------|--------|
| Pd(1)  | 4204(1) | 221(1)   | 859(1)  | 31(1)  |
| Cl(1)  | 5981(1) | -467(1)  | 791(1)  | 55(1)  |
| C(1)   | 4303(3) | -33(3)   | 2180(3) | 23(1)  |
| C(2)   | 5284(3) | -246(3)  | 2791(3) | 27(1)  |
| C(3)   | 5236(4) | -507(3)  | 3682(3) | 30(1)  |
| C(4)   | 4213(4) | -566(3)  | 3992(3) | 31(1)  |
| C(5)   | 3227(3) | -333(3)  | 3408(3) | 26(1)  |
| C(6)   | 3278(3) | -56(3)   | 2516(3) | 22(1)  |
| P(1)   | 2081(1) | 205(1)   | 1670(1) | 22(1)  |
| C(7)   | 1430(3) | -964(3)  | 1339(3) | 27(1)  |
| C(8)   | 1461(4) | -1340(4) | 478(3)  | 39(1)  |
| C(9)   | 1041(5) | -2274(4) | 258(4)  | 60(2)  |
| C(10)  | 615(5)  | -2833(4) | 890(5)  | 62(2)  |
| C(11)  | 579(4)  | -2466(4) | 1745(5) | 52(1)  |
| C(12)  | 991(4)  | -1538(4) | 1973(4) | 39(1)  |
| C(13)  | 1049(3) | 939(3)   | 2097(3) | 25(1)  |
| C(14)  | -99(4)  | 744(4)   | 1878(3) | 34(1)  |
| C(15)  | -864(4) | 1382(4)  | 2179(4) | 44(1)  |
| C(16)  | -486(4) | 2192(4)  | 2690(4) | 44(1)  |
| C(17)  | 646(5)  | 2382(4)  | 2920(4) | 49(1)  |
| C(18)  | 1420(4) | 1765(3)  | 2613(3) | 38(1)  |
| N(1)   | 2642(3) | 761(3)   | 918(2)  | 28(1)  |
| C(19)  | 2028(3) | 1376(3)  | 208(3)  | 30(1)  |
| C(20)  | 2623(3) | 2347(3)  | 146(3)  | 30(1)  |
| O(1)   | 3310(3) | 2713(2)  | 725(2)  | 38(1)  |
| O(2)   | 2239(3) | 2766(3)  | -663(2) | 40(1)  |
| C(21)  | 2711(5) | 3717(4)  | -804(4) | 49(1)  |
| C(22)  | 5910(5) | 3276(4)  | 1070(3) | 70(2)  |
| Cl(2)  | 6163(2) | 2030(2)  | 927(2)  | 81(1)  |
| Cl(3)  | 6260(3) | 3890(2)  | 51(2)   | 96(1)  |
| Cl(4)  | 6739(2) | 3778(3)  | 2010(2) | 87(1)  |
| Cl(2A) | 5298(5) | 4409(4)  | 999(5)  | 80(2)  |
| Cl(3A) | 6678(7) | 2889(8)  | 328(5)  | 123(4) |
| Cl(4A) | 6598(5) | 3078(8)  | 2238(4) | 85(3)  |

Table S3. Bond lengths [Å] and angles [°] for **2a.2CHCl<sub>3</sub>**.

---

|               |            |
|---------------|------------|
| Pd(1)-C(1)    | 1.976(4)   |
| Pd(1)-N(1)    | 2.028(3)   |
| Pd(1)-Cl(1)   | 2.3439(11) |
| Pd(1)-Cl(1)#1 | 2.4464(11) |
| Cl(1)-Pd(1)#1 | 2.4464(11) |
| C(1)-C(2)     | 1.388(5)   |
| C(1)-C(6)     | 1.404(5)   |
| C(2)-C(3)     | 1.381(6)   |
| C(2)-H(2)     | 0.9300     |
| C(3)-C(4)     | 1.385(6)   |
| C(3)-H(3)     | 0.9300     |
| C(4)-C(5)     | 1.378(6)   |
| C(4)-H(4)     | 0.9300     |
| C(5)-C(6)     | 1.389(5)   |
| C(5)-H(5)     | 0.9300     |
| C(6)-P(1)     | 1.775(4)   |
| P(1)-N(1)     | 1.590(3)   |
| P(1)-C(13)    | 1.788(4)   |
| P(1)-C(7)     | 1.798(4)   |
| C(7)-C(8)     | 1.384(6)   |
| C(7)-C(12)    | 1.394(6)   |
| C(8)-C(9)     | 1.382(8)   |
| C(8)-H(8)     | 0.9300     |
| C(9)-C(10)    | 1.371(9)   |
| C(9)-H(9)     | 0.9300     |
| C(10)-C(11)   | 1.371(9)   |
| C(10)-H(10)   | 0.9300     |
| C(11)-C(12)   | 1.374(7)   |
| C(11)-H(11)   | 0.9300     |
| C(12)-H(12)   | 0.9300     |
| C(13)-C(14)   | 1.386(6)   |
| C(13)-C(18)   | 1.386(6)   |
| C(14)-C(15)   | 1.390(6)   |
| C(14)-H(14)   | 0.9300     |
| C(15)-C(16)   | 1.368(7)   |
| C(15)-H(15)   | 0.9300     |
| C(16)-C(17)   | 1.368(8)   |
| C(16)-H(16)   | 0.9300     |
| C(17)-C(18)   | 1.384(7)   |
| C(17)-H(17)   | 0.9300     |
| C(18)-H(18)   | 0.9300     |
| N(1)-C(19)    | 1.443(5)   |
| C(19)-C(20)   | 1.509(6)   |
| C(19)-H(19A)  | 0.9700     |
| C(19)-H(19B)  | 0.9700     |
| C(20)-O(1)    | 1.193(5)   |
| C(20)-O(2)    | 1.338(5)   |
| O(2)-C(21)    | 1.438(6)   |
| C(21)-H(21A)  | 0.9600     |
| C(21)-H(21B)  | 0.9600     |
| C(21)-H(21C)  | 0.9600     |
| C(22)-Cl(3A)  | 1.639(6)   |
| C(22)-Cl(2A)  | 1.699(6)   |
| C(22)-Cl(4)   | 1.711(5)   |
| C(22)-Cl(2)   | 1.737(5)   |
| C(22)-Cl(4A)  | 1.809(6)   |
| C(22)-Cl(3)   | 1.837(5)   |
| C(22)-H(22)   | 0.9800     |

|                     |            |
|---------------------|------------|
| C(22)-H(22A)        | 0.9908     |
| Cl(2)-H(22A)        | 1.5403     |
| Cl(2A)-H(22)        | 1.4272     |
| C(1)-Pd(1)-N(1)     | 85.36(14)  |
| C(1)-Pd(1)-Cl(1)    | 94.23(11)  |
| N(1)-Pd(1)-Cl(1)    | 177.75(11) |
| C(1)-Pd(1)-Cl(1)#1  | 177.20(12) |
| N(1)-Pd(1)-Cl(1)#1  | 93.87(9)   |
| Cl(1)-Pd(1)-Cl(1)#1 | 86.44(4)   |
| Pd(1)-Cl(1)-Pd(1)#1 | 93.56(4)   |
| C(2)-C(1)-C(6)      | 117.4(3)   |
| C(2)-C(1)-Pd(1)     | 125.8(3)   |
| C(6)-C(1)-Pd(1)     | 116.7(3)   |
| C(3)-C(2)-C(1)      | 120.6(4)   |
| C(3)-C(2)-H(2)      | 119.7      |
| C(1)-C(2)-H(2)      | 119.7      |
| C(2)-C(3)-C(4)      | 121.2(4)   |
| C(2)-C(3)-H(3)      | 119.4      |
| C(4)-C(3)-H(3)      | 119.4      |
| C(5)-C(4)-C(3)      | 119.5(4)   |
| C(5)-C(4)-H(4)      | 120.3      |
| C(3)-C(4)-H(4)      | 120.3      |
| C(4)-C(5)-C(6)      | 119.2(4)   |
| C(4)-C(5)-H(5)      | 120.4      |
| C(6)-C(5)-H(5)      | 120.4      |
| C(5)-C(6)-C(1)      | 122.0(4)   |
| C(5)-C(6)-P(1)      | 124.6(3)   |
| C(1)-C(6)-P(1)      | 113.3(3)   |
| N(1)-P(1)-C(6)      | 101.79(17) |
| N(1)-P(1)-C(13)     | 112.75(19) |
| C(6)-P(1)-C(13)     | 112.64(18) |
| N(1)-P(1)-C(7)      | 116.3(2)   |
| C(6)-P(1)-C(7)      | 106.17(18) |
| C(13)-P(1)-C(7)     | 107.07(19) |
| C(8)-C(7)-C(12)     | 119.4(4)   |
| C(8)-C(7)-P(1)      | 119.9(4)   |
| C(12)-C(7)-P(1)     | 120.3(3)   |
| C(9)-C(8)-C(7)      | 119.3(5)   |
| C(9)-C(8)-H(8)      | 120.3      |
| C(7)-C(8)-H(8)      | 120.3      |
| C(10)-C(9)-C(8)     | 120.6(6)   |
| C(10)-C(9)-H(9)     | 119.7      |
| C(8)-C(9)-H(9)      | 119.7      |
| C(11)-C(10)-C(9)    | 120.5(5)   |
| C(11)-C(10)-H(10)   | 119.7      |
| C(9)-C(10)-H(10)    | 119.7      |
| C(10)-C(11)-C(12)   | 119.6(6)   |
| C(10)-C(11)-H(11)   | 120.2      |
| C(12)-C(11)-H(11)   | 120.2      |
| C(11)-C(12)-C(7)    | 120.5(5)   |
| C(11)-C(12)-H(12)   | 119.8      |
| C(7)-C(12)-H(12)    | 119.8      |
| C(14)-C(13)-C(18)   | 119.7(4)   |
| C(14)-C(13)-P(1)    | 122.1(3)   |
| C(18)-C(13)-P(1)    | 118.1(3)   |
| C(13)-C(14)-C(15)   | 119.4(4)   |
| C(13)-C(14)-H(14)   | 120.3      |
| C(15)-C(14)-H(14)   | 120.3      |
| C(16)-C(15)-C(14)   | 120.3(5)   |

|                     |            |
|---------------------|------------|
| C(16)-C(15)-H(15)   | 119.9      |
| C(14)-C(15)-H(15)   | 119.9      |
| C(15)-C(16)-C(17)   | 120.7(5)   |
| C(15)-C(16)-H(16)   | 119.6      |
| C(17)-C(16)-H(16)   | 119.6      |
| C(16)-C(17)-C(18)   | 119.8(5)   |
| C(16)-C(17)-H(17)   | 120.1      |
| C(18)-C(17)-H(17)   | 120.1      |
| C(17)-C(18)-C(13)   | 120.1(4)   |
| C(17)-C(18)-H(18)   | 120.0      |
| C(13)-C(18)-H(18)   | 120.0      |
| C(19)-N(1)-P(1)     | 124.3(3)   |
| C(19)-N(1)-Pd(1)    | 122.5(2)   |
| P(1)-N(1)-Pd(1)     | 111.33(18) |
| N(1)-C(19)-C(20)    | 111.2(3)   |
| N(1)-C(19)-H(19A)   | 109.4      |
| C(20)-C(19)-H(19A)  | 109.4      |
| N(1)-C(19)-H(19B)   | 109.4      |
| C(20)-C(19)-H(19B)  | 109.4      |
| H(19A)-C(19)-H(19B) | 108.0      |
| O(1)-C(20)-O(2)     | 124.1(4)   |
| O(1)-C(20)-C(19)    | 126.5(4)   |
| O(2)-C(20)-C(19)    | 109.4(4)   |
| C(20)-O(2)-C(21)    | 115.3(4)   |
| O(2)-C(21)-H(21A)   | 109.5      |
| O(2)-C(21)-H(21B)   | 109.5      |
| H(21A)-C(21)-H(21B) | 109.5      |
| O(2)-C(21)-H(21C)   | 109.5      |
| H(21A)-C(21)-H(21C) | 109.5      |
| H(21B)-C(21)-H(21C) | 109.5      |
| Cl(3A)-C(22)-Cl(2A) | 122.4(5)   |
| Cl(3A)-C(22)-Cl(4)  | 111.2(5)   |
| Cl(2A)-C(22)-Cl(4)  | 82.8(3)    |
| Cl(3A)-C(22)-Cl(2)  | 58.4(4)    |
| Cl(2A)-C(22)-Cl(2)  | 162.9(4)   |
| Cl(4)-C(22)-Cl(2)   | 113.5(3)   |
| Cl(3A)-C(22)-Cl(4A) | 112.4(4)   |
| Cl(2A)-C(22)-Cl(4A) | 108.3(4)   |
| Cl(2)-C(22)-Cl(4A)  | 85.0(4)    |
| Cl(3A)-C(22)-Cl(3)  | 50.0(4)    |
| Cl(2A)-C(22)-Cl(3)  | 72.4(3)    |
| Cl(4)-C(22)-Cl(3)   | 108.0(3)   |
| Cl(2)-C(22)-Cl(3)   | 105.7(3)   |
| Cl(4A)-C(22)-Cl(3)  | 136.6(5)   |
| Cl(3A)-C(22)-H(22)  | 138.4      |
| Cl(2A)-C(22)-H(22)  | 57.1       |
| Cl(4)-C(22)-H(22)   | 109.8      |
| Cl(2)-C(22)-H(22)   | 109.8      |
| Cl(4A)-C(22)-H(22)  | 105.2      |
| Cl(3)-C(22)-H(22)   | 109.9      |
| Cl(3A)-C(22)-H(22A) | 104.3      |
| Cl(2A)-C(22)-H(22A) | 103.6      |
| Cl(4)-C(22)-H(22A)  | 132.9      |
| Cl(2)-C(22)-H(22A)  | 61.8       |
| Cl(4A)-C(22)-H(22A) | 103.8      |
| Cl(3)-C(22)-H(22A)  | 118.5      |
| H(22)-C(22)-H(22A)  | 48.2       |

---

Symmetry transformations used to generate equivalent atoms:

#1 -x+1,-y,-z

Table S4. Anisotropic displacement parameters ( $\text{\AA}^2 \times 10^3$ ) for **2a.2CHCl<sub>3</sub>**. The anisotropic displacement factor exponent takes the form:  $-2\pi^2 [ h^2 a^{*2}U^{11} + \dots + 2 h k a^* b^* U^{12} ]$

|        | U <sup>11</sup> | U <sup>22</sup> | U <sup>33</sup> | U <sup>23</sup> | U <sup>13</sup> | U <sup>12</sup> |
|--------|-----------------|-----------------|-----------------|-----------------|-----------------|-----------------|
| Pd(1)  | 22(1)           | 49(1)           | 24(1)           | 15(1)           | 7(1)            | 6(1)            |
| Cl(1)  | 33(1)           | 106(1)          | 29(1)           | 27(1)           | 13(1)           | 29(1)           |
| C(1)   | 26(2)           | 19(2)           | 25(2)           | 2(1)            | 4(1)            | 0(1)            |
| C(2)   | 23(2)           | 30(2)           | 28(2)           | 1(2)            | 2(2)            | -2(2)           |
| C(3)   | 32(2)           | 30(2)           | 25(2)           | -1(2)           | -4(2)           | 4(2)            |
| C(4)   | 39(2)           | 38(2)           | 17(2)           | 1(2)            | 3(2)            | 4(2)            |
| C(5)   | 30(2)           | 26(2)           | 23(2)           | 2(2)            | 7(2)            | 1(2)            |
| C(6)   | 24(2)           | 18(2)           | 23(2)           | 1(1)            | 2(1)            | -1(1)           |
| P(1)   | 20(1)           | 25(1)           | 21(1)           | 3(1)            | 4(1)            | -1(1)           |
| C(7)   | 21(2)           | 27(2)           | 31(2)           | -2(2)           | -1(2)           | 0(2)            |
| C(8)   | 37(2)           | 41(3)           | 36(2)           | -8(2)           | -4(2)           | 10(2)           |
| C(9)   | 68(4)           | 40(3)           | 61(4)           | -23(3)          | -24(3)          | 16(3)           |
| C(10)  | 45(3)           | 23(3)           | 101(5)          | -12(3)          | -37(3)          | 5(2)            |
| C(11)  | 36(3)           | 30(3)           | 85(4)           | 5(3)            | -2(3)           | -8(2)           |
| C(12)  | 35(2)           | 32(3)           | 50(3)           | -2(2)           | 10(2)           | -8(2)           |
| C(13)  | 27(2)           | 24(2)           | 25(2)           | 7(2)            | 7(2)            | 2(2)            |
| C(14)  | 29(2)           | 36(3)           | 36(2)           | -1(2)           | 7(2)            | 1(2)            |
| C(15)  | 30(2)           | 51(3)           | 52(3)           | 4(2)            | 14(2)           | 9(2)            |
| C(16)  | 52(3)           | 36(3)           | 49(3)           | 8(2)            | 20(2)           | 19(2)           |
| C(17)  | 56(3)           | 29(3)           | 60(3)           | -8(2)           | 7(3)            | 9(2)            |
| C(18)  | 33(2)           | 31(3)           | 49(3)           | -2(2)           | 1(2)            | 1(2)            |
| N(1)   | 21(2)           | 38(2)           | 25(2)           | 13(2)           | 6(1)            | 1(2)            |
| C(19)  | 22(2)           | 40(3)           | 29(2)           | 13(2)           | 5(2)            | 3(2)            |
| C(20)  | 24(2)           | 39(3)           | 29(2)           | 9(2)            | 10(2)           | 12(2)           |
| O(1)   | 42(2)           | 37(2)           | 37(2)           | 0(1)            | 7(2)            | 1(2)            |
| O(2)   | 32(2)           | 49(2)           | 38(2)           | 22(2)           | 8(1)            | 5(1)            |
| C(21)  | 54(3)           | 42(3)           | 58(3)           | 23(3)           | 31(3)           | 12(2)           |
| C(22)  | 44(3)           | 67(4)           | 97(5)           | -18(4)          | 13(3)           | -1(3)           |
| Cl(2)  | 50(1)           | 55(1)           | 140(2)          | -17(1)          | 22(1)           | -1(1)           |
| Cl(3)  | 101(2)          | 81(2)           | 113(2)          | -7(2)           | 35(2)           | -14(2)          |
| Cl(4)  | 54(1)           | 100(2)          | 112(2)          | -44(2)          | 33(1)           | -25(2)          |
| Cl(2A) | 67(4)           | 67(4)           | 102(5)          | 23(4)           | 1(3)            | -21(3)          |
| Cl(3A) | 111(7)          | 190(12)         | 75(5)           | -47(6)          | 35(5)           | -7(7)           |
| Cl(4A) | 32(3)           | 160(9)          | 62(4)           | 5(5)            | 2(3)            | 29(4)           |

Table S5. Hydrogen coordinates ( $\times 10^4$ ) and isotropic displacement parameters ( $\text{\AA}^2 \times 10^3$ )  
for **2a.2CHCl<sub>3</sub>**.

|        | x     | y     | z     | U(eq) |
|--------|-------|-------|-------|-------|
| H(2)   | 5981  | -211  | 2598  | 33    |
| H(3)   | 5903  | -647  | 4081  | 36    |
| H(4)   | 4192  | -761  | 4589  | 38    |
| H(5)   | 2535  | -361  | 3610  | 32    |
| H(8)   | 1761  | -968  | 51    | 47    |
| H(9)   | 1048  | -2526 | -323  | 72    |
| H(10)  | 348   | -3465 | 737   | 75    |
| H(11)  | 277   | -2844 | 2167  | 62    |
| H(12)  | 976   | -1291 | 2555  | 47    |
| H(14)  | -356  | 191   | 1534  | 41    |
| H(15)  | -1637 | 1258  | 2032  | 52    |
| H(16)  | -1005 | 2617  | 2883  | 53    |
| H(17)  | 896   | 2925  | 3281  | 58    |
| H(18)  | 2189  | 1904  | 2752  | 46    |
| H(19A) | 1273  | 1496  | 335   | 36    |
| H(19B) | 1956  | 1036  | -373  | 36    |
| H(21A) | 2526  | 4172  | -356  | 74    |
| H(21B) | 2402  | 3952  | -1404 | 74    |
| H(21C) | 3518  | 3663  | -744  | 74    |
| H(22)  | 5110  | 3380  | 1103  | 83    |
| H(22A) | 5257  | 2819  | 993   | 104   |

Table S6. Crystal data and structure refinement for **2d**.

|                                   |                                                        |                              |
|-----------------------------------|--------------------------------------------------------|------------------------------|
| Empirical formula                 | C <sub>24</sub> H <sub>20</sub> Cl N <sub>2</sub> P Pd |                              |
| Formula weight                    | 509.24                                                 |                              |
| Temperature                       | 150(1) K                                               |                              |
| Wavelength                        | 0.71073 Å                                              |                              |
| Crystal system                    | Monoclinic                                             |                              |
| Space group                       | P2(1)/n                                                |                              |
| Unit cell dimensions              | a = 11.2481(3) Å                                       | $\alpha = 90^\circ$ .        |
|                                   | b = 15.4741(4) Å                                       | $\beta = 104.696(3)^\circ$ . |
|                                   | c = 12.6043(4) Å                                       | $\gamma = 90^\circ$ .        |
| Volume                            | 2122.06(10) Å <sup>3</sup>                             |                              |
| Z                                 | 4                                                      |                              |
| Density (calculated)              | 1.594 Mg/m <sup>3</sup>                                |                              |
| Absorption coefficient            | 1.089 mm <sup>-1</sup>                                 |                              |
| F(000)                            | 1024                                                   |                              |
| Crystal size                      | 0.60 x 0.33 x 0.22 mm <sup>3</sup>                     |                              |
| Theta range for data collection   | 2.81 to 32.35°.                                        |                              |
| Index ranges                      | -16 ≤ h ≤ 16, -22 ≤ k ≤ 22, -18 ≤ l ≤ 17               |                              |
| Reflections collected             | 21998                                                  |                              |
| Independent reflections           | 6652 [R(int) = 0.0268]                                 |                              |
| Completeness to theta = 32.35°    | 87.8 %                                                 |                              |
| Max. and min. transmission        | 0.7957 and 0.5612                                      |                              |
| Refinement method                 | Full-matrix least-squares on F <sup>2</sup>            |                              |
| Data / restraints / parameters    | 6652 / 0 / 262                                         |                              |
| Goodness-of-fit on F <sup>2</sup> | 0.963                                                  |                              |
| Final R indices [I > 2σ(I)]       | R1 = 0.0303, wR2 = 0.0781                              |                              |
| R indices (all data)              | R1 = 0.0499, wR2 = 0.0817                              |                              |
| Largest diff. peak and hole       | 1.907 and -0.527 e.Å <sup>-3</sup>                     |                              |



Table S7. Atomic coordinates ( $\times 10^4$ ) and equivalent isotropic displacement parameters ( $\text{\AA}^2 \times 10^3$ ) for **2d**.  $U(\text{eq})$  is defined as one third of the trace of the orthogonalized  $U^{\text{ij}}$  tensor.

|       | x        | y       | z       | U(eq) |
|-------|----------|---------|---------|-------|
| Pd(1) | 6793(1)  | 1073(1) | 2796(1) | 18(1) |
| P(1)  | 4643(1)  | 2168(1) | 3127(1) | 18(1) |
| Cl(1) | 7711(1)  | -108(1) | 2211(1) | 38(1) |
| N(1)  | 6101(2)  | 2136(1) | 3305(2) | 21(1) |
| N(2)  | 8439(2)  | 1702(1) | 3627(2) | 21(1) |
| C(1)  | 5084(2)  | 711(1)  | 2110(2) | 20(1) |
| C(2)  | 4690(2)  | 21(1)   | 1385(2) | 27(1) |
| C(3)  | 3456(3)  | -120(2) | 889(2)  | 33(1) |
| C(4)  | 2547(2)  | 406(2)  | 1103(2) | 34(1) |
| C(5)  | 2887(2)  | 1088(2) | 1820(2) | 27(1) |
| C(6)  | 4129(2)  | 1245(1) | 2303(2) | 21(1) |
| C(7)  | 3963(2)  | 3118(1) | 2391(2) | 20(1) |
| C(8)  | 2752(2)  | 3362(2) | 2299(2) | 29(1) |
| C(9)  | 2250(3)  | 4044(2) | 1616(2) | 40(1) |
| C(10) | 2963(3)  | 4474(2) | 1035(2) | 40(1) |
| C(11) | 4161(3)  | 4247(2) | 1142(2) | 34(1) |
| C(12) | 4672(2)  | 3564(1) | 1816(2) | 24(1) |
| C(13) | 4167(2)  | 2122(1) | 4383(2) | 21(1) |
| C(14) | 4102(2)  | 1322(2) | 4860(2) | 25(1) |
| C(15) | 3819(3)  | 1262(2) | 5871(2) | 34(1) |
| C(16) | 3621(3)  | 2007(2) | 6402(2) | 35(1) |
| C(17) | 3704(3)  | 2805(2) | 5951(2) | 34(1) |
| C(18) | 3977(2)  | 2870(2) | 4932(2) | 28(1) |
| C(19) | 6954(2)  | 2670(1) | 4108(2) | 22(1) |
| C(20) | 8254(2)  | 2433(1) | 4149(2) | 19(1) |
| C(21) | 9220(2)  | 2942(2) | 4708(2) | 25(1) |
| C(22) | 10415(2) | 2682(2) | 4751(2) | 32(1) |
| C(23) | 10599(2) | 1936(2) | 4225(2) | 34(1) |
| C(24) | 9603(2)  | 1467(2) | 3665(2) | 28(1) |

Table S8. Bond lengths [Å] and angles [°] for **2d**.

|                  |            |
|------------------|------------|
| Pd(1)-C(1)       | 1.978(2)   |
| Pd(1)-N(1)       | 1.9942(17) |
| Pd(1)-N(2)       | 2.1180(19) |
| Pd(1)-Cl(1)      | 2.3108(6)  |
| P(1)-N(1)        | 1.5985(18) |
| P(1)-C(6)        | 1.774(2)   |
| P(1)-C(13)       | 1.797(2)   |
| P(1)-C(7)        | 1.802(2)   |
| N(1)-C(19)       | 1.461(3)   |
| N(2)-C(24)       | 1.348(3)   |
| N(2)-C(20)       | 1.351(3)   |
| C(1)-C(2)        | 1.403(3)   |
| C(1)-C(6)        | 1.424(3)   |
| C(2)-C(3)        | 1.387(4)   |
| C(3)-C(4)        | 1.387(3)   |
| C(4)-C(5)        | 1.378(3)   |
| C(5)-C(6)        | 1.396(3)   |
| C(7)-C(12)       | 1.389(3)   |
| C(7)-C(8)        | 1.391(3)   |
| C(8)-C(9)        | 1.389(4)   |
| C(9)-C(10)       | 1.387(4)   |
| C(10)-C(11)      | 1.366(4)   |
| C(11)-C(12)      | 1.385(4)   |
| C(13)-C(14)      | 1.386(3)   |
| C(13)-C(18)      | 1.392(3)   |
| C(14)-C(15)      | 1.392(3)   |
| C(15)-C(16)      | 1.379(4)   |
| C(16)-C(17)      | 1.373(4)   |
| C(17)-C(18)      | 1.397(3)   |
| C(19)-C(20)      | 1.495(3)   |
| C(20)-C(21)      | 1.381(3)   |
| C(21)-C(22)      | 1.391(3)   |
| C(22)-C(23)      | 1.372(4)   |
| C(23)-C(24)      | 1.371(4)   |
| C(1)-Pd(1)-N(1)  | 87.64(8)   |
| C(1)-Pd(1)-N(2)  | 167.59(8)  |
| N(1)-Pd(1)-N(2)  | 79.96(7)   |
| C(1)-Pd(1)-Cl(1) | 95.75(6)   |
| N(1)-Pd(1)-Cl(1) | 176.26(5)  |
| N(2)-Pd(1)-Cl(1) | 96.64(5)   |
| N(1)-P(1)-C(6)   | 103.18(10) |
| N(1)-P(1)-C(13)  | 113.52(11) |
| C(6)-P(1)-C(13)  | 111.00(10) |
| N(1)-P(1)-C(7)   | 112.57(10) |
| C(6)-P(1)-C(7)   | 108.84(11) |
| C(13)-P(1)-C(7)  | 107.65(10) |
| C(19)-N(1)-P(1)  | 123.41(14) |
| C(19)-N(1)-Pd(1) | 116.60(14) |
| P(1)-N(1)-Pd(1)  | 116.76(10) |
| C(24)-N(2)-C(20) | 118.4(2)   |
| C(24)-N(2)-Pd(1) | 127.83(16) |
| C(20)-N(2)-Pd(1) | 113.73(14) |
| C(2)-C(1)-C(6)   | 115.2(2)   |
| C(2)-C(1)-Pd(1)  | 127.70(16) |
| C(6)-C(1)-Pd(1)  | 116.92(16) |
| C(3)-C(2)-C(1)   | 121.9(2)   |
| C(2)-C(3)-C(4)   | 121.5(2)   |

|                   |            |
|-------------------|------------|
| C(5)-C(4)-C(3)    | 118.8(2)   |
| C(4)-C(5)-C(6)    | 120.0(2)   |
| C(5)-C(6)-C(1)    | 122.6(2)   |
| C(5)-C(6)-P(1)    | 122.48(16) |
| C(1)-C(6)-P(1)    | 114.76(18) |
| C(12)-C(7)-C(8)   | 120.1(2)   |
| C(12)-C(7)-P(1)   | 116.71(17) |
| C(8)-C(7)-P(1)    | 122.92(17) |
| C(9)-C(8)-C(7)    | 119.6(2)   |
| C(10)-C(9)-C(8)   | 119.6(3)   |
| C(11)-C(10)-C(9)  | 120.8(3)   |
| C(10)-C(11)-C(12) | 120.2(2)   |
| C(11)-C(12)-C(7)  | 119.7(2)   |
| C(14)-C(13)-C(18) | 119.7(2)   |
| C(14)-C(13)-P(1)  | 118.52(16) |
| C(18)-C(13)-P(1)  | 121.49(17) |
| C(13)-C(14)-C(15) | 120.4(2)   |
| C(16)-C(15)-C(14) | 119.4(2)   |
| C(17)-C(16)-C(15) | 120.9(2)   |
| C(16)-C(17)-C(18) | 120.0(2)   |
| C(13)-C(18)-C(17) | 119.6(2)   |
| N(1)-C(19)-C(20)  | 110.50(17) |
| N(2)-C(20)-C(21)  | 121.8(2)   |
| N(2)-C(20)-C(19)  | 117.26(19) |
| C(21)-C(20)-C(19) | 120.9(2)   |
| C(20)-C(21)-C(22) | 118.9(2)   |
| C(23)-C(22)-C(21) | 119.1(2)   |
| C(24)-C(23)-C(22) | 119.4(2)   |
| N(2)-C(24)-C(23)  | 122.4(2)   |

---

Table S9. Anisotropic displacement parameters ( $\text{\AA}^2 \times 10^3$ ) for **2d**. The anisotropic displacement factor exponent takes the form:  $-2\pi^2 [ h^2 a^{*2} U^{11} + \dots + 2 h k a^* b^* U^{12} ]$

|       | U <sup>11</sup> | U <sup>22</sup> | U <sup>33</sup> | U <sup>23</sup> | U <sup>13</sup> | U <sup>12</sup> |
|-------|-----------------|-----------------|-----------------|-----------------|-----------------|-----------------|
| Pd(1) | 21(1)           | 16(1)           | 17(1)           | 0(1)            | 6(1)            | 3(1)            |
| P(1)  | 18(1)           | 18(1)           | 18(1)           | -3(1)           | 6(1)            | 0(1)            |
| Cl(1) | 34(1)           | 29(1)           | 48(1)           | -13(1)          | 9(1)            | 10(1)           |
| N(1)  | 18(1)           | 19(1)           | 26(1)           | -6(1)           | 6(1)            | -2(1)           |
| N(2)  | 21(1)           | 22(1)           | 19(1)           | 4(1)            | 6(1)            | 3(1)            |
| C(1)  | 27(1)           | 18(1)           | 14(1)           | 1(1)            | 5(1)            | 0(1)            |
| C(2)  | 37(1)           | 18(1)           | 25(1)           | -3(1)           | 7(1)            | 2(1)            |
| C(3)  | 40(2)           | 24(1)           | 32(1)           | -10(1)          | 5(1)            | -9(1)           |
| C(4)  | 31(1)           | 31(1)           | 34(1)           | -4(1)           | 0(1)            | -9(1)           |
| C(5)  | 25(1)           | 27(1)           | 28(1)           | -1(1)           | 5(1)            | -1(1)           |
| C(6)  | 24(1)           | 21(1)           | 19(1)           | -1(1)           | 8(1)            | -2(1)           |
| C(7)  | 24(1)           | 18(1)           | 18(1)           | -3(1)           | 3(1)            | 3(1)            |
| C(8)  | 24(1)           | 30(1)           | 31(1)           | -2(1)           | 5(1)            | 2(1)            |
| C(9)  | 34(1)           | 41(2)           | 39(2)           | -3(1)           | -1(1)           | 14(1)           |
| C(10) | 55(2)           | 28(1)           | 31(2)           | 6(1)            | 0(1)            | 14(1)           |
| C(11) | 53(2)           | 22(1)           | 26(1)           | -1(1)           | 9(1)            | -2(1)           |
| C(12) | 31(1)           | 21(1)           | 20(1)           | -3(1)           | 6(1)            | -1(1)           |
| C(13) | 18(1)           | 25(1)           | 18(1)           | -3(1)           | 5(1)            | 0(1)            |
| C(14) | 24(1)           | 30(1)           | 21(1)           | -1(1)           | 5(1)            | -1(1)           |
| C(15) | 37(1)           | 41(2)           | 23(1)           | 4(1)            | 8(1)            | -4(1)           |
| C(16) | 36(1)           | 52(2)           | 19(1)           | -6(1)           | 10(1)           | 0(1)            |
| C(17) | 40(2)           | 41(1)           | 24(1)           | -9(1)           | 12(1)           | 4(1)            |
| C(18) | 33(1)           | 28(1)           | 23(1)           | -4(1)           | 8(1)            | 0(1)            |
| C(19) | 21(1)           | 22(1)           | 22(1)           | -5(1)           | 5(1)            | 0(1)            |
| C(20) | 22(1)           | 21(1)           | 14(1)           | 5(1)            | 5(1)            | 0(1)            |
| C(21) | 26(1)           | 26(1)           | 21(1)           | 3(1)            | 4(1)            | -4(1)           |
| C(22) | 24(1)           | 37(1)           | 31(1)           | 5(1)            | 0(1)            | -8(1)           |
| C(23) | 20(1)           | 40(1)           | 40(2)           | 11(1)           | 8(1)            | 4(1)            |
| C(24) | 26(1)           | 28(1)           | 30(1)           | 7(1)            | 11(1)           | 6(1)            |

Table S10. Hydrogen coordinates ( $\times 10^4$ ) and isotropic displacement parameters ( $\text{\AA}^2 \times 10^{-3}$ )  
for **2d**.

|        | x     | y    | z    | U(eq) |
|--------|-------|------|------|-------|
| H(2A)  | 5285  | -362 | 1231 | 32    |
| H(3A)  | 3229  | -588 | 390  | 39    |
| H(4A)  | 1705  | 299  | 762  | 40    |
| H(5A)  | 2277  | 1451 | 1985 | 32    |
| H(8A)  | 2270  | 3064 | 2702 | 34    |
| H(9A)  | 1422  | 4215 | 1548 | 48    |
| H(10A) | 2615  | 4933 | 556  | 48    |
| H(11A) | 4646  | 4557 | 754  | 40    |
| H(12A) | 5502  | 3402 | 1884 | 29    |
| H(14A) | 4252  | 812  | 4496 | 30    |
| H(15A) | 3762  | 713  | 6191 | 40    |
| H(16A) | 3424  | 1967 | 7091 | 42    |
| H(17A) | 3577  | 3313 | 6331 | 41    |
| H(18A) | 4032  | 3421 | 4615 | 33    |
| H(19A) | 6803  | 2587 | 4841 | 26    |
| H(19B) | 6815  | 3287 | 3907 | 26    |
| H(21A) | 9071  | 3460 | 5057 | 30    |
| H(22A) | 11095 | 3017 | 5138 | 38    |
| H(23A) | 11409 | 1747 | 4249 | 40    |
| H(24A) | 9738  | 958  | 3290 | 33    |

Table S11. Crystal data and structure refinement for **3b**·CH<sub>2</sub>Cl<sub>2</sub>.

|                                   |                                                                                    |                 |
|-----------------------------------|------------------------------------------------------------------------------------|-----------------|
| Empirical formula                 | C <sub>25</sub> H <sub>27</sub> Cl <sub>3</sub> N <sub>3</sub> O <sub>5</sub> P Pd |                 |
| Formula weight                    | 693.22                                                                             |                 |
| Temperature                       | 100(1) K                                                                           |                 |
| Wavelength                        | 0.71073 Å                                                                          |                 |
| Crystal system                    | Monoclinic                                                                         |                 |
| Space group                       | P2 <sub>1</sub> /n                                                                 |                 |
| Unit cell dimensions              | a = 8.0096(12) Å                                                                   | α = 90°.        |
|                                   | b = 22.592(3) Å                                                                    | β = 92.464(3)°. |
|                                   | c = 15.594(2) Å                                                                    | γ = 90°.        |
| Volume                            | 2819.2(7) Å <sup>3</sup>                                                           |                 |
| Z                                 | 4                                                                                  |                 |
| Density (calculated)              | 1.633 Mg/m <sup>3</sup>                                                            |                 |
| Absorption coefficient            | 1.040 mm <sup>-1</sup>                                                             |                 |
| F(000)                            | 1400                                                                               |                 |
| Crystal size                      | 0.18 x 0.08 x 0.07 mm <sup>3</sup>                                                 |                 |
| Theta range for data collection   | 1.59 to 25.00°.                                                                    |                 |
| Index ranges                      | -9 ≤ h ≤ 9, -26 ≤ k ≤ 26, -18 ≤ l ≤ 18                                             |                 |
| Reflections collected             | 20461                                                                              |                 |
| Independent reflections           | 4972 [R(int) = 0.1116]                                                             |                 |
| Completeness to theta = 25.00°    | 100.0 %                                                                            |                 |
| Absorption correction             | Semi-empirical from equivalents                                                    |                 |
| Max. and min. transmission        | 0.929 and 0.743                                                                    |                 |
| Refinement method                 | Full-matrix least-squares on F <sup>2</sup>                                        |                 |
| Data / restraints / parameters    | 4972 / 31 / 383                                                                    |                 |
| Goodness-of-fit on F <sup>2</sup> | 0.993                                                                              |                 |
| Final R indices [I > 2σ(I)]       | R1 = 0.0586, wR2 = 0.1245                                                          |                 |
| R indices (all data)              | R1 = 0.0942, wR2 = 0.1408                                                          |                 |
| Largest diff. peak and hole       | 0.639 and -1.136 e.Å <sup>-3</sup>                                                 |                 |

Table S12. Atomic coordinates ( $\times 10^4$ ) and equivalent isotropic displacement parameters ( $\text{\AA}^2 \times 10^3$ ) for **3b**·CH<sub>2</sub>Cl<sub>2</sub>. U(eq) is defined as one third of the trace of the orthogonalized U<sup>ij</sup> tensor.

|       | x        | y        | z        | U(eq) |
|-------|----------|----------|----------|-------|
| Pd(1) | 8656(1)  | 539(1)   | 8981(1)  | 24(1) |
| C(1)  | 9881(8)  | 1245(3)  | 8663(4)  | 26(2) |
| C(2)  | 10686(8) | 1355(3)  | 7899(4)  | 31(2) |
| C(3)  | 11534(8) | 1871(3)  | 7761(4)  | 36(2) |
| C(4)  | 11609(8) | 2313(3)  | 8369(4)  | 32(2) |
| C(5)  | 10842(8) | 2235(3)  | 9135(4)  | 29(2) |
| C(6)  | 9986(8)  | 1706(3)  | 9275(4)  | 25(2) |
| P(1)  | 8960(2)  | 1569(1)  | 10241(1) | 24(1) |
| C(7)  | 7192(8)  | 2047(3)  | 10287(4) | 25(2) |
| C(8)  | 6233(9)  | 2076(3)  | 11022(4) | 32(2) |
| C(9)  | 4861(8)  | 2441(3)  | 11018(5) | 38(2) |
| C(10) | 4407(9)  | 2779(3)  | 10326(5) | 38(2) |
| C(11) | 5308(9)  | 2745(3)  | 9596(5)  | 38(2) |
| C(12) | 6692(8)  | 2384(3)  | 9581(4)  | 30(2) |
| C(13) | 10271(8) | 1709(3)  | 11179(4) | 25(2) |
| C(14) | 11365(8) | 1281(3)  | 11446(4) | 31(2) |
| C(15) | 12416(8) | 1359(3)  | 12166(4) | 31(2) |
| C(16) | 12352(9) | 1872(3)  | 12621(4) | 33(2) |
| C(17) | 11249(8) | 2317(3)  | 12355(4) | 31(2) |
| C(18) | 10210(8) | 2242(3)  | 11631(4) | 29(2) |
| N(1)  | 8546(7)  | 879(2)   | 10141(3) | 25(1) |
| C(19) | 7649(8)  | 533(3)   | 10775(4) | 28(2) |
| C(20) | 7109(8)  | -45(3)   | 10377(4) | 26(2) |
| O(1)  | 7313(5)  | -142(2)  | 9588(3)  | 26(1) |
| N(2)  | 6424(6)  | -438(2)  | 10864(3) | 27(1) |
| C(21) | 6015(9)  | -320(3)  | 11755(4) | 33(2) |
| C(22) | 5877(8)  | -1012(3) | 10529(4) | 32(2) |
| N(3)  | 8717(7)  | 183(2)   | 7805(4)  | 30(1) |
| C(23) | 8651(8)  | -2(3)    | 7135(5)  | 35(2) |
| C(24) | 8555(10) | -230(4)  | 6258(4)  | 48(2) |
| C(25) | 4662(10) | 820(4)   | 5787(5)  | 49(2) |
| Cl(1) | 2826(3)  | 1223(1)  | 5632(2)  | 82(1) |
| Cl(2) | 6096(3)  | 1175(1)  | 6498(1)  | 53(1) |
| Cl(3) | 6775(2)  | 860(1)   | 3578(1)  | 43(1) |
| O(2A) | 7597(13) | 533(6)   | 4271(7)  | 75(5) |
| O(3A) | 7825(19) | 998(6)   | 2921(9)  | 78(6) |
| O(4A) | 5349(14) | 542(6)   | 3308(8)  | 56(4) |
| O(5A) | 6240(20) | 1386(4)  | 3995(8)  | 99(7) |
| O(2B) | 7689(15) | 292(4)   | 3567(12) | 63(6) |
| O(3B) | 7060(20) | 1134(7)  | 2759(7)  | 67(7) |
| O(4B) | 5108(11) | 727(7)   | 3643(12) | 79(8) |
| O(5B) | 7500(20) | 1179(7)  | 4232(7)  | 64(6) |

Table S13. Bond lengths [ $\text{\AA}$ ] and angles [ $^\circ$ ] for **3b**·CH<sub>2</sub>Cl<sub>2</sub>.

---

|              |           |
|--------------|-----------|
| Pd(1)-C(1)   | 1.948(6)  |
| Pd(1)-N(1)   | 1.972(5)  |
| Pd(1)-N(3)   | 2.004(6)  |
| Pd(1)-O(1)   | 2.122(4)  |
| C(1)-C(2)    | 1.401(9)  |
| C(1)-C(6)    | 1.414(9)  |
| C(2)-C(3)    | 1.370(9)  |
| C(2)-H(2)    | 0.9300    |
| C(3)-C(4)    | 1.377(10) |
| C(3)-H(3)    | 0.9300    |
| C(4)-C(5)    | 1.378(9)  |
| C(4)-H(4)    | 0.9300    |
| C(5)-C(6)    | 1.400(9)  |
| C(5)-H(5)    | 0.9300    |
| C(6)-P(1)    | 1.775(6)  |
| P(1)-N(1)    | 1.598(5)  |
| P(1)-C(7)    | 1.786(7)  |
| P(1)-C(13)   | 1.791(6)  |
| C(7)-C(12)   | 1.385(9)  |
| C(7)-C(8)    | 1.408(9)  |
| C(8)-C(9)    | 1.373(9)  |
| C(8)-H(8)    | 0.9300    |
| C(9)-C(10)   | 1.359(10) |
| C(9)-H(9)    | 0.9300    |
| C(10)-C(11)  | 1.376(10) |
| C(10)-H(10)  | 0.9300    |
| C(11)-C(12)  | 1.377(9)  |
| C(11)-H(11)  | 0.9300    |
| C(12)-H(12)  | 0.9300    |
| C(13)-C(14)  | 1.358(9)  |
| C(13)-C(18)  | 1.398(9)  |
| C(14)-C(15)  | 1.386(9)  |
| C(14)-H(14)  | 0.9300    |
| C(15)-C(16)  | 1.360(9)  |
| C(15)-H(15)  | 0.9300    |
| C(16)-C(17)  | 1.391(9)  |
| C(16)-H(16)  | 0.9300    |
| C(17)-C(18)  | 1.384(8)  |
| C(17)-H(17)  | 0.9300    |
| C(18)-H(18)  | 0.9300    |
| N(1)-C(19)   | 1.471(8)  |
| C(19)-C(20)  | 1.502(9)  |
| C(19)-H(19A) | 0.9700    |
| C(19)-H(19B) | 0.9700    |
| C(20)-O(1)   | 1.268(7)  |
| C(20)-N(2)   | 1.302(8)  |
| N(2)-C(22)   | 1.459(8)  |
| N(2)-C(21)   | 1.467(8)  |
| C(21)-H(21A) | 0.9600    |
| C(21)-H(21B) | 0.9600    |
| C(21)-H(21C) | 0.9600    |
| C(22)-H(22A) | 0.9600    |
| C(22)-H(22B) | 0.9600    |
| C(22)-H(22C) | 0.9600    |
| N(3)-C(23)   | 1.124(8)  |
| C(23)-C(24)  | 1.461(10) |
| C(24)-H(24A) | 0.9600    |



|              |          |
|--------------|----------|
| C(24)-H(24B) | 0.9600   |
| C(24)-H(24C) | 0.9600   |
| C(25)-Cl(1)  | 1.737(8) |
| C(25)-Cl(2)  | 1.755(8) |
| C(25)-H(25A) | 0.9700   |
| C(25)-H(25B) | 0.9700   |
| Cl(3)-O(5B)  | 1.360(8) |
| Cl(3)-O(4B)  | 1.377(8) |
| Cl(3)-O(3A)  | 1.389(7) |
| Cl(3)-O(4A)  | 1.398(7) |
| Cl(3)-O(5A)  | 1.430(7) |
| Cl(3)-O(2A)  | 1.445(7) |
| Cl(3)-O(3B)  | 1.446(9) |
| Cl(3)-O(2B)  | 1.478(9) |

|                   |           |
|-------------------|-----------|
| C(1)-Pd(1)-N(1)   | 87.6(2)   |
| C(1)-Pd(1)-N(3)   | 93.6(2)   |
| N(1)-Pd(1)-N(3)   | 178.7(2)  |
| C(1)-Pd(1)-O(1)   | 167.8(2)  |
| N(1)-Pd(1)-O(1)   | 80.20(19) |
| N(3)-Pd(1)-O(1)   | 98.6(2)   |
| C(2)-C(1)-C(6)    | 115.2(6)  |
| C(2)-C(1)-Pd(1)   | 128.2(5)  |
| C(6)-C(1)-Pd(1)   | 116.6(5)  |
| C(3)-C(2)-C(1)    | 122.3(7)  |
| C(3)-C(2)-H(2)    | 118.8     |
| C(1)-C(2)-H(2)    | 118.8     |
| C(2)-C(3)-C(4)    | 121.1(7)  |
| C(2)-C(3)-H(3)    | 119.4     |
| C(4)-C(3)-H(3)    | 119.4     |
| C(3)-C(4)-C(5)    | 119.7(7)  |
| C(3)-C(4)-H(4)    | 120.1     |
| C(5)-C(4)-H(4)    | 120.1     |
| C(4)-C(5)-C(6)    | 118.9(6)  |
| C(4)-C(5)-H(5)    | 120.5     |
| C(6)-C(5)-H(5)    | 120.5     |
| C(5)-C(6)-C(1)    | 122.7(6)  |
| C(5)-C(6)-P(1)    | 122.0(5)  |
| C(1)-C(6)-P(1)    | 115.3(5)  |
| N(1)-P(1)-C(6)    | 100.9(3)  |
| N(1)-P(1)-C(7)    | 115.6(3)  |
| C(6)-P(1)-C(7)    | 109.0(3)  |
| N(1)-P(1)-C(13)   | 111.3(3)  |
| C(6)-P(1)-C(13)   | 112.7(3)  |
| C(7)-P(1)-C(13)   | 107.3(3)  |
| C(12)-C(7)-C(8)   | 118.2(6)  |
| C(12)-C(7)-P(1)   | 120.3(5)  |
| C(8)-C(7)-P(1)    | 121.5(5)  |
| C(9)-C(8)-C(7)    | 119.3(7)  |
| C(9)-C(8)-H(8)    | 120.4     |
| C(7)-C(8)-H(8)    | 120.4     |
| C(10)-C(9)-C(8)   | 121.8(7)  |
| C(10)-C(9)-H(9)   | 119.1     |
| C(8)-C(9)-H(9)    | 119.1     |
| C(9)-C(10)-C(11)  | 119.6(7)  |
| C(9)-C(10)-H(10)  | 120.2     |
| C(11)-C(10)-H(10) | 120.2     |
| C(10)-C(11)-C(12) | 119.9(7)  |
| C(10)-C(11)-H(11) | 120.0     |
| C(12)-C(11)-H(11) | 120.0     |

|                     |          |
|---------------------|----------|
| C(11)-C(12)-C(7)    | 121.1(6) |
| C(11)-C(12)-H(12)   | 119.4    |
| C(7)-C(12)-H(12)    | 119.4    |
| C(14)-C(13)-C(18)   | 119.6(6) |
| C(14)-C(13)-P(1)    | 118.2(5) |
| C(18)-C(13)-P(1)    | 122.2(5) |
| C(13)-C(14)-C(15)   | 121.3(7) |
| C(13)-C(14)-H(14)   | 119.4    |
| C(15)-C(14)-H(14)   | 119.4    |
| C(16)-C(15)-C(14)   | 119.7(7) |
| C(16)-C(15)-H(15)   | 120.2    |
| C(14)-C(15)-H(15)   | 120.2    |
| C(15)-C(16)-C(17)   | 119.9(7) |
| C(15)-C(16)-H(16)   | 120.0    |
| C(17)-C(16)-H(16)   | 120.0    |
| C(18)-C(17)-C(16)   | 120.4(6) |
| C(18)-C(17)-H(17)   | 119.8    |
| C(16)-C(17)-H(17)   | 119.8    |
| C(17)-C(18)-C(13)   | 119.0(6) |
| C(17)-C(18)-H(18)   | 120.5    |
| C(13)-C(18)-H(18)   | 120.5    |
| C(19)-N(1)-P(1)     | 123.9(4) |
| C(19)-N(1)-Pd(1)    | 116.8(4) |
| P(1)-N(1)-Pd(1)     | 116.9(3) |
| N(1)-C(19)-C(20)    | 109.0(5) |
| N(1)-C(19)-H(19A)   | 109.9    |
| C(20)-C(19)-H(19A)  | 109.9    |
| N(1)-C(19)-H(19B)   | 109.9    |
| C(20)-C(19)-H(19B)  | 109.9    |
| H(19A)-C(19)-H(19B) | 108.3    |
| O(1)-C(20)-N(2)     | 121.6(6) |
| O(1)-C(20)-C(19)    | 120.2(6) |
| N(2)-C(20)-C(19)    | 118.3(6) |
| C(20)-O(1)-Pd(1)    | 113.4(4) |
| C(20)-N(2)-C(22)    | 121.6(6) |
| C(20)-N(2)-C(21)    | 123.0(6) |
| C(22)-N(2)-C(21)    | 115.1(5) |
| N(2)-C(21)-H(21A)   | 109.5    |
| N(2)-C(21)-H(21B)   | 109.5    |
| H(21A)-C(21)-H(21B) | 109.5    |
| N(2)-C(21)-H(21C)   | 109.5    |
| H(21A)-C(21)-H(21C) | 109.5    |
| H(21B)-C(21)-H(21C) | 109.5    |
| N(2)-C(22)-H(22A)   | 109.5    |
| N(2)-C(22)-H(22B)   | 109.5    |
| H(22A)-C(22)-H(22B) | 109.5    |
| N(2)-C(22)-H(22C)   | 109.5    |
| H(22A)-C(22)-H(22C) | 109.5    |
| H(22B)-C(22)-H(22C) | 109.5    |
| C(23)-N(3)-Pd(1)    | 175.5(6) |
| N(3)-C(23)-C(24)    | 178.9(8) |
| C(23)-C(24)-H(24A)  | 109.5    |
| C(23)-C(24)-H(24B)  | 109.5    |
| H(24A)-C(24)-H(24B) | 109.5    |
| C(23)-C(24)-H(24C)  | 109.5    |
| H(24A)-C(24)-H(24C) | 109.5    |
| H(24B)-C(24)-H(24C) | 109.5    |
| Cl(1)-C(25)-Cl(2)   | 112.1(4) |
| Cl(1)-C(25)-H(25A)  | 109.2    |
| Cl(2)-C(25)-H(25A)  | 109.2    |

|                     |           |
|---------------------|-----------|
| Cl(1)-C(25)-H(25B)  | 109.2     |
| Cl(2)-C(25)-H(25B)  | 109.2     |
| H(25A)-C(25)-H(25B) | 107.9     |
| O(5B)-Cl(3)-O(4B)   | 116.4(9)  |
| O(5B)-Cl(3)-O(3A)   | 100.5(10) |
| O(4B)-Cl(3)-O(3A)   | 136.4(11) |
| O(5B)-Cl(3)-O(4A)   | 144.6(9)  |
| O(4B)-Cl(3)-O(4A)   | 29.3(7)   |
| O(3A)-Cl(3)-O(4A)   | 113.9(7)  |
| O(5B)-Cl(3)-O(5A)   | 49.2(6)   |
| O(4B)-Cl(3)-O(5A)   | 80.5(10)  |
| O(3A)-Cl(3)-O(5A)   | 110.7(6)  |
| O(4A)-Cl(3)-O(5A)   | 107.7(8)  |
| O(5B)-Cl(3)-O(2A)   | 62.8(8)   |
| O(4B)-Cl(3)-O(2A)   | 104.2(9)  |
| O(3A)-Cl(3)-O(2A)   | 113.3(7)  |
| O(4A)-Cl(3)-O(2A)   | 107.6(6)  |
| O(5A)-Cl(3)-O(2A)   | 102.8(7)  |
| O(5B)-Cl(3)-O(3B)   | 111.0(7)  |
| O(4B)-Cl(3)-O(3B)   | 110.4(8)  |
| O(3A)-Cl(3)-O(3B)   | 29.4(7)   |
| O(4A)-Cl(3)-O(3B)   | 96.4(9)   |
| O(5A)-Cl(3)-O(3B)   | 96.2(8)   |
| O(2A)-Cl(3)-O(3B)   | 142.8(9)  |
| O(5B)-Cl(3)-O(2B)   | 105.8(8)  |
| O(4B)-Cl(3)-O(2B)   | 107.1(7)  |
| O(3A)-Cl(3)-O(2B)   | 82.5(8)   |
| O(4A)-Cl(3)-O(2B)   | 87.1(8)   |
| O(5A)-Cl(3)-O(2B)   | 152.4(8)  |
| O(2A)-Cl(3)-O(2B)   | 49.8(6)   |
| O(3B)-Cl(3)-O(2B)   | 105.4(8)  |

---

Table S14. Anisotropic displacement parameters ( $\text{\AA}^2 \times 10^3$ ) for **3b**·CH<sub>2</sub>Cl<sub>2</sub>. The anisotropic displacement factor exponent takes the form:  $-2\pi^2 [ h^2 a^{*2}U^{11} + \dots + 2 h k a^* b^* U^{12} ]$

|       | U <sup>11</sup> | U <sup>22</sup> | U <sup>33</sup> | U <sup>23</sup> | U <sup>13</sup> | U <sup>12</sup> |
|-------|-----------------|-----------------|-----------------|-----------------|-----------------|-----------------|
| Pd(1) | 26(1)           | 25(1)           | 21(1)           | -2(1)           | 2(1)            | 1(1)            |
| C(1)  | 20(3)           | 30(4)           | 26(4)           | 4(3)            | -1(3)           | -2(3)           |
| C(2)  | 35(4)           | 35(4)           | 25(4)           | 0(3)            | 3(3)            | 3(3)            |
| C(3)  | 29(4)           | 52(5)           | 27(4)           | 4(4)            | 5(3)            | -3(4)           |
| C(4)  | 25(4)           | 37(4)           | 33(4)           | 6(3)            | -3(3)           | -4(3)           |
| C(5)  | 26(4)           | 30(4)           | 30(4)           | 0(3)            | -5(3)           | -4(3)           |
| C(6)  | 25(4)           | 31(4)           | 19(3)           | 5(3)            | 1(3)            | 1(3)            |
| P(1)  | 28(1)           | 24(1)           | 21(1)           | 0(1)            | 1(1)            | -1(1)           |
| C(7)  | 24(4)           | 24(4)           | 28(4)           | -3(3)           | -1(3)           | -6(3)           |
| C(8)  | 38(4)           | 32(4)           | 25(4)           | 0(3)            | 2(3)            | -6(3)           |
| C(9)  | 25(4)           | 50(5)           | 38(4)           | -9(4)           | 7(3)            | -2(4)           |
| C(10) | 35(4)           | 33(4)           | 46(5)           | -12(4)          | 5(4)            | -1(3)           |
| C(11) | 39(4)           | 42(5)           | 33(4)           | -3(4)           | -8(3)           | 2(4)            |
| C(12) | 28(4)           | 34(4)           | 27(4)           | -2(3)           | 1(3)            | 2(3)            |
| C(13) | 27(4)           | 29(4)           | 19(3)           | -2(3)           | 6(3)            | -4(3)           |
| C(14) | 39(4)           | 27(4)           | 26(4)           | 3(3)            | 4(3)            | -3(3)           |
| C(15) | 32(4)           | 30(4)           | 33(4)           | 3(3)            | -3(3)           | 0(3)            |
| C(16) | 35(4)           | 37(4)           | 27(4)           | 3(3)            | 0(3)            | -3(3)           |
| C(17) | 44(4)           | 22(4)           | 27(4)           | -7(3)           | 1(3)            | -3(3)           |
| C(18) | 32(4)           | 27(4)           | 29(4)           | -3(3)           | 5(3)            | -1(3)           |
| N(1)  | 32(3)           | 23(3)           | 21(3)           | -3(2)           | 2(2)            | -3(2)           |
| C(19) | 26(3)           | 26(4)           | 30(4)           | 3(3)            | 1(3)            | 0(3)            |
| C(20) | 20(3)           | 25(4)           | 33(4)           | -1(3)           | 0(3)            | 5(3)            |
| O(1)  | 36(3)           | 22(2)           | 21(2)           | -5(2)           | 4(2)            | 4(2)            |
| N(2)  | 29(3)           | 22(3)           | 30(3)           | -1(2)           | 8(2)            | 0(2)            |
| C(21) | 36(4)           | 35(4)           | 29(4)           | 0(3)            | 8(3)            | -3(3)           |
| C(22) | 32(4)           | 24(4)           | 39(4)           | -2(3)           | 2(3)            | 0(3)            |
| N(3)  | 32(3)           | 26(3)           | 33(3)           | -9(3)           | 2(3)            | 0(3)            |
| C(23) | 31(4)           | 28(4)           | 45(5)           | -7(4)           | 2(3)            | -6(3)           |
| C(24) | 49(5)           | 68(6)           | 25(4)           | -16(4)          | 7(4)            | 0(4)            |
| C(25) | 62(5)           | 35(5)           | 49(5)           | -7(4)           | 8(4)            | 6(4)            |
| Cl(1) | 95(2)           | 74(2)           | 74(2)           | -28(1)          | -25(2)          | 43(2)           |
| Cl(2) | 67(1)           | 43(1)           | 51(1)           | 4(1)            | 7(1)            | -1(1)           |
| Cl(3) | 44(1)           | 39(1)           | 45(1)           | 4(1)            | -4(1)           | -4(1)           |
| O(2A) | 59(7)           | 111(13)         | 55(8)           | 22(9)           | -5(6)           | 9(8)            |
| O(3A) | 66(10)          | 92(13)          | 82(10)          | 20(8)           | 53(8)           | -2(8)           |
| O(4A) | 52(7)           | 64(8)           | 51(9)           | 9(7)            | -12(6)          | -12(6)          |
| O(5A) | 230(20)         | 26(6)           | 39(7)           | 0(5)            | 16(10)          | 14(9)           |
| O(2B) | 55(9)           | 27(8)           | 106(16)         | 7(8)            | -13(9)          | 10(6)           |
| O(3B) | 109(17)         | 22(8)           | 74(13)          | 5(7)            | 49(11)          | 12(10)          |
| O(4B) | 38(9)           | 160(20)         | 40(12)          | -6(11)          | 2(7)            | -22(11)         |
| O(5B) | 95(13)          | 49(12)          | 46(9)           | -9(8)           | -28(8)          | -22(9)          |

Table S15. Hydrogen coordinates ( $\times 10^4$ ) and isotropic displacement parameters ( $\text{\AA}^2 \times 10^{-3}$ )  
for **3b**·CH<sub>2</sub>Cl<sub>2</sub>.

|        | x     | y     | z     | U(eq) |
|--------|-------|-------|-------|-------|
| H(2)   | 10644 | 1069  | 7471  | 38    |
| H(3)   | 12068 | 1923  | 7249  | 43    |
| H(4)   | 12175 | 2663  | 8263  | 38    |
| H(5)   | 10892 | 2529  | 9552  | 34    |
| H(8)   | 6527  | 1852  | 11505 | 38    |
| H(9)   | 4224  | 2456  | 11502 | 45    |
| H(10)  | 3492  | 3031  | 10346 | 46    |
| H(11)  | 4983  | 2966  | 9114  | 46    |
| H(12)  | 7301  | 2367  | 9087  | 36    |
| H(14)  | 11409 | 929   | 11139 | 37    |
| H(15)  | 13163 | 1062  | 12338 | 38    |
| H(16)  | 13044 | 1924  | 13109 | 40    |
| H(17)  | 11210 | 2668  | 12665 | 37    |
| H(18)  | 9482  | 2542  | 11449 | 35    |
| H(19A) | 6679  | 752   | 10951 | 33    |
| H(19B) | 8373  | 462   | 11278 | 33    |
| H(21A) | 6816  | -49   | 12009 | 49    |
| H(21B) | 6044  | -684  | 12074 | 49    |
| H(21C) | 4917  | -150  | 11767 | 49    |
| H(22A) | 6177  | -1048 | 9941  | 48    |
| H(22B) | 4686  | -1045 | 10561 | 48    |
| H(22C) | 6408  | -1321 | 10863 | 48    |
| H(24A) | 8922  | 69    | 5872  | 71    |
| H(24B) | 7422  | -338  | 6105  | 71    |
| H(24C) | 9259  | -573  | 6222  | 71    |
| H(25A) | 5168  | 764   | 5239  | 58    |
| H(25B) | 4400  | 432   | 6013  | 58    |

Table S16. Crystal data and structure refinement for **7b**.

|                                   |                                                                       |                    |
|-----------------------------------|-----------------------------------------------------------------------|--------------------|
| Empirical formula                 | C <sub>27</sub> H <sub>27</sub> Cl N <sub>3</sub> O <sub>5</sub> P Pd |                    |
| Formula weight                    | 646.34                                                                |                    |
| Temperature                       | 100(1) K                                                              |                    |
| Wavelength                        | 0.71073 Å                                                             |                    |
| Crystal system                    | Monoclinic                                                            |                    |
| Space group                       | P 21/c                                                                |                    |
| Unit cell dimensions              | a = 13.1099(11) Å                                                     | α = 90°.           |
|                                   | b = 13.2935(11) Å                                                     | β = 106.6200(10)°. |
|                                   | c = 16.0085(13) Å                                                     | γ = 90°.           |
| Volume                            | 2673.3(4) Å <sup>3</sup>                                              |                    |
| Z                                 | 4                                                                     |                    |
| Density (calculated)              | 1.606 Mg/m <sup>3</sup>                                               |                    |
| Absorption coefficient            | 0.897 mm <sup>-1</sup>                                                |                    |
| F(000)                            | 1312                                                                  |                    |
| Crystal size                      | 0.13 x 0.10 x 0.09 mm <sup>3</sup>                                    |                    |
| Theta range for data collection   | 2.23 to 27.56°.                                                       |                    |
| Index ranges                      | -16 ≤ h ≤ 17, -16 ≤ k ≤ 17, -20 ≤ l ≤ 20                              |                    |
| Reflections collected             | 17019                                                                 |                    |
| Independent reflections           | 6119 [R(int) = 0.0497]                                                |                    |
| Completeness to theta = 25.00°    | 99.9 %                                                                |                    |
| Absorption correction             | Semi-empirical from equivalents                                       |                    |
| Max. and min. transmission        | 0.9224 and 0.7984                                                     |                    |
| Refinement method                 | Full-matrix least-squares on F <sup>2</sup>                           |                    |
| Data / restraints / parameters    | 6119 / 0 / 345                                                        |                    |
| Goodness-of-fit on F <sup>2</sup> | 1.010                                                                 |                    |
| Final R indices [I > 2σ(I)]       | R1 = 0.0418, wR2 = 0.0888                                             |                    |
| R indices (all data)              | R1 = 0.0625, wR2 = 0.0971                                             |                    |
| Largest diff. peak and hole       | 0.758 and -0.429 e.Å <sup>-3</sup>                                    |                    |

Table S17. Atomic coordinates ( $\times 10^4$ ) and equivalent isotropic displacement parameters ( $\text{\AA}^2 \times 10^3$ ) for **7b**.  $U(\text{eq})$  is defined as one third of the trace of the orthogonalized  $U^{ij}$  tensor.

|       | x        | y        | z       | U(eq) |
|-------|----------|----------|---------|-------|
| Pd(1) | 3177(1)  | 1060(1)  | 6021(1) | 14(1) |
| C(1)  | 4307(3)  | 1483(3)  | 5505(2) | 18(1) |
| C(2)  | 5379(3)  | 1249(3)  | 5785(2) | 26(1) |
| C(3)  | 6089(3)  | 1626(3)  | 5368(3) | 32(1) |
| C(4)  | 5759(3)  | 2252(3)  | 4654(2) | 28(1) |
| C(5)  | 4700(3)  | 2485(3)  | 4349(2) | 23(1) |
| C(6)  | 3974(3)  | 2108(3)  | 4758(2) | 16(1) |
| P(1)  | 2589(1)  | 2381(1)  | 4381(1) | 14(1) |
| C(7)  | 2027(3)  | 1858(2)  | 3316(2) | 15(1) |
| C(8)  | 2537(3)  | 1081(3)  | 3013(2) | 19(1) |
| C(9)  | 2017(3)  | 595(3)   | 2233(2) | 22(1) |
| C(10) | 999(3)   | 893(3)   | 1768(2) | 23(1) |
| C(11) | 506(3)   | 1663(3)  | 2062(2) | 21(1) |
| C(12) | 1010(3)  | 2158(3)  | 2835(2) | 17(1) |
| C(13) | 2351(3)  | 3710(2)  | 4276(2) | 14(1) |
| C(14) | 2378(3)  | 4240(3)  | 3531(2) | 20(1) |
| C(15) | 2249(3)  | 5268(3)  | 3496(3) | 26(1) |
| C(16) | 2095(3)  | 5781(3)  | 4206(3) | 27(1) |
| C(17) | 2040(3)  | 5271(3)  | 4928(3) | 28(1) |
| C(18) | 2178(3)  | 4233(3)  | 4973(2) | 21(1) |
| N(1)  | 2156(2)  | 1882(2)  | 5122(2) | 18(1) |
| C(19) | 1040(3)  | 1807(3)  | 5094(2) | 18(1) |
| C(20) | 942(3)   | 1134(3)  | 5842(2) | 15(1) |
| O(1)  | 1757(2)  | 756(2)   | 6357(2) | 18(1) |
| N(2)  | -9(2)    | 945(2)   | 5925(2) | 17(1) |
| C(21) | -112(3)  | 310(3)   | 6643(2) | 23(1) |
| C(22) | -1003(3) | 1371(3)  | 5368(2) | 25(1) |
| N(3)  | 4127(2)  | 230(2)   | 7011(2) | 19(1) |
| C(23) | 3873(3)  | -738(3)  | 7093(2) | 23(1) |
| C(24) | 4386(3)  | -1324(3) | 7803(3) | 29(1) |
| C(25) | 5187(3)  | -893(3)  | 8449(3) | 32(1) |
| C(26) | 5463(3)  | 95(3)    | 8373(3) | 29(1) |
| C(27) | 4918(3)  | 628(3)   | 7647(2) | 23(1) |
| Cl(1) | 8287(1)  | 2822(1)  | 3098(1) | 20(1) |
| O(2)  | 8241(2)  | 2994(2)  | 2208(2) | 37(1) |
| O(3)  | 7297(2)  | 3115(2)  | 3243(2) | 33(1) |
| O(4)  | 9140(2)  | 3396(2)  | 3661(2) | 31(1) |
| O(5)  | 8477(2)  | 1772(2)  | 3292(2) | 32(1) |

Table S18. Bond lengths [Å] and angles [°] for **7b**.

---

|              |          |
|--------------|----------|
| Pd(1)-C(1)   | 1.974(3) |
| Pd(1)-N(1)   | 1.988(3) |
| Pd(1)-N(3)   | 2.037(3) |
| Pd(1)-O(1)   | 2.118(2) |
| C(1)-C(2)    | 1.383(5) |
| C(1)-C(6)    | 1.419(5) |
| C(2)-C(3)    | 1.384(5) |
| C(2)-H(2)    | 0.9300   |
| C(3)-C(4)    | 1.380(6) |
| C(3)-H(3)    | 0.9300   |
| C(4)-C(5)    | 1.370(5) |
| C(4)-H(4)    | 0.9300   |
| C(5)-C(6)    | 1.392(5) |
| C(5)-H(5)    | 0.9300   |
| C(6)-P(1)    | 1.780(3) |
| P(1)-N(1)    | 1.599(3) |
| P(1)-C(7)    | 1.794(3) |
| P(1)-C(13)   | 1.794(3) |
| C(7)-C(8)    | 1.391(5) |
| C(7)-C(12)   | 1.393(5) |
| C(8)-C(9)    | 1.398(5) |
| C(8)-H(8)    | 0.9300   |
| C(9)-C(10)   | 1.387(5) |
| C(9)-H(9)    | 0.9300   |
| C(10)-C(11)  | 1.365(5) |
| C(10)-H(10)  | 0.9300   |
| C(11)-C(12)  | 1.390(5) |
| C(11)-H(11)  | 0.9300   |
| C(12)-H(12)  | 0.9300   |
| C(13)-C(18)  | 1.388(5) |
| C(13)-C(14)  | 1.394(5) |
| C(14)-C(15)  | 1.376(5) |
| C(14)-H(14)  | 0.9300   |
| C(15)-C(16)  | 1.388(6) |
| C(15)-H(15)  | 0.9300   |
| C(16)-C(17)  | 1.360(6) |
| C(16)-H(16)  | 0.9300   |
| C(17)-C(18)  | 1.391(5) |
| C(17)-H(17)  | 0.9300   |
| C(18)-H(18)  | 0.9300   |
| N(1)-C(19)   | 1.454(4) |
| C(19)-C(20)  | 1.530(5) |
| C(19)-H(19A) | 0.9700   |
| C(19)-H(19B) | 0.9700   |
| C(20)-O(1)   | 1.253(4) |
| C(20)-N(2)   | 1.316(4) |
| N(2)-C(21)   | 1.462(4) |
| N(2)-C(22)   | 1.467(4) |
| C(21)-H(21A) | 0.9600   |
| C(21)-H(21B) | 0.9600   |
| C(21)-H(21C) | 0.9600   |
| C(22)-H(22A) | 0.9600   |
| C(22)-H(22B) | 0.9600   |
| C(22)-H(22C) | 0.9600   |
| N(3)-C(27)   | 1.337(5) |
| N(3)-C(23)   | 1.345(5) |
| C(23)-C(24)  | 1.384(5) |



|                   |            |
|-------------------|------------|
| C(23)-H(23)       | 0.9300     |
| C(24)-C(25)       | 1.371(6)   |
| C(24)-H(24)       | 0.9300     |
| C(25)-C(26)       | 1.378(6)   |
| C(25)-H(25)       | 0.9300     |
| C(26)-C(27)       | 1.374(5)   |
| C(26)-H(26)       | 0.9300     |
| C(27)-H(27)       | 0.9300     |
| Cl(1)-O(2)        | 1.428(3)   |
| Cl(1)-O(3)        | 1.436(3)   |
| Cl(1)-O(5)        | 1.437(3)   |
| Cl(1)-O(4)        | 1.439(3)   |
|                   |            |
| C(1)-Pd(1)-N(1)   | 88.33(13)  |
| C(1)-Pd(1)-N(3)   | 96.59(13)  |
| N(1)-Pd(1)-N(3)   | 174.68(11) |
| C(1)-Pd(1)-O(1)   | 168.46(12) |
| N(1)-Pd(1)-O(1)   | 80.22(10)  |
| N(3)-Pd(1)-O(1)   | 94.91(10)  |
| C(2)-C(1)-C(6)    | 116.4(3)   |
| C(2)-C(1)-Pd(1)   | 127.9(3)   |
| C(6)-C(1)-Pd(1)   | 115.6(2)   |
| C(1)-C(2)-C(3)    | 121.5(4)   |
| C(1)-C(2)-H(2)    | 119.2      |
| C(3)-C(2)-H(2)    | 119.2      |
| C(4)-C(3)-C(2)    | 121.5(4)   |
| C(4)-C(3)-H(3)    | 119.2      |
| C(2)-C(3)-H(3)    | 119.2      |
| C(5)-C(4)-C(3)    | 118.5(3)   |
| C(5)-C(4)-H(4)    | 120.7      |
| C(3)-C(4)-H(4)    | 120.7      |
| C(4)-C(5)-C(6)    | 120.7(4)   |
| C(4)-C(5)-H(5)    | 119.7      |
| C(6)-C(5)-H(5)    | 119.7      |
| C(5)-C(6)-C(1)    | 121.3(3)   |
| C(5)-C(6)-P(1)    | 122.4(3)   |
| C(1)-C(6)-P(1)    | 116.3(3)   |
| N(1)-P(1)-C(6)    | 102.03(15) |
| N(1)-P(1)-C(7)    | 114.08(16) |
| C(6)-P(1)-C(7)    | 110.21(16) |
| N(1)-P(1)-C(13)   | 112.92(16) |
| C(6)-P(1)-C(13)   | 111.44(16) |
| C(7)-P(1)-C(13)   | 106.25(16) |
| C(8)-C(7)-C(12)   | 120.0(3)   |
| C(8)-C(7)-P(1)    | 120.7(3)   |
| C(12)-C(7)-P(1)   | 118.8(3)   |
| C(7)-C(8)-C(9)    | 119.6(3)   |
| C(7)-C(8)-H(8)    | 120.2      |
| C(9)-C(8)-H(8)    | 120.2      |
| C(10)-C(9)-C(8)   | 119.7(3)   |
| C(10)-C(9)-H(9)   | 120.1      |
| C(8)-C(9)-H(9)    | 120.1      |
| C(11)-C(10)-C(9)  | 120.5(3)   |
| C(11)-C(10)-H(10) | 119.8      |
| C(9)-C(10)-H(10)  | 119.8      |
| C(10)-C(11)-C(12) | 120.7(3)   |
| C(10)-C(11)-H(11) | 119.6      |
| C(12)-C(11)-H(11) | 119.6      |
| C(11)-C(12)-C(7)  | 119.5(3)   |
| C(11)-C(12)-H(12) | 120.3      |

|                     |            |
|---------------------|------------|
| C(7)-C(12)-H(12)    | 120.3      |
| C(18)-C(13)-C(14)   | 119.0(3)   |
| C(18)-C(13)-P(1)    | 118.8(3)   |
| C(14)-C(13)-P(1)    | 122.1(3)   |
| C(15)-C(14)-C(13)   | 120.2(3)   |
| C(15)-C(14)-H(14)   | 119.9      |
| C(13)-C(14)-H(14)   | 119.9      |
| C(14)-C(15)-C(16)   | 120.0(4)   |
| C(14)-C(15)-H(15)   | 120.0      |
| C(16)-C(15)-H(15)   | 120.0      |
| C(17)-C(16)-C(15)   | 120.4(4)   |
| C(17)-C(16)-H(16)   | 119.8      |
| C(15)-C(16)-H(16)   | 119.8      |
| C(16)-C(17)-C(18)   | 120.1(4)   |
| C(16)-C(17)-H(17)   | 119.9      |
| C(18)-C(17)-H(17)   | 119.9      |
| C(13)-C(18)-C(17)   | 120.2(3)   |
| C(13)-C(18)-H(18)   | 119.9      |
| C(17)-C(18)-H(18)   | 119.9      |
| C(19)-N(1)-P(1)     | 125.0(2)   |
| C(19)-N(1)-Pd(1)    | 116.6(2)   |
| P(1)-N(1)-Pd(1)     | 117.20(16) |
| N(1)-C(19)-C(20)    | 109.0(3)   |
| N(1)-C(19)-H(19A)   | 109.9      |
| C(20)-C(19)-H(19A)  | 109.9      |
| N(1)-C(19)-H(19B)   | 109.9      |
| C(20)-C(19)-H(19B)  | 109.9      |
| H(19A)-C(19)-H(19B) | 108.3      |
| O(1)-C(20)-N(2)     | 120.8(3)   |
| O(1)-C(20)-C(19)    | 120.2(3)   |
| N(2)-C(20)-C(19)    | 119.1(3)   |
| C(20)-O(1)-Pd(1)    | 113.8(2)   |
| C(20)-N(2)-C(21)    | 119.6(3)   |
| C(20)-N(2)-C(22)    | 124.6(3)   |
| C(21)-N(2)-C(22)    | 115.8(3)   |
| N(2)-C(21)-H(21A)   | 109.5      |
| N(2)-C(21)-H(21B)   | 109.5      |
| H(21A)-C(21)-H(21B) | 109.5      |
| N(2)-C(21)-H(21C)   | 109.5      |
| H(21A)-C(21)-H(21C) | 109.5      |
| H(21B)-C(21)-H(21C) | 109.5      |
| N(2)-C(22)-H(22A)   | 109.5      |
| N(2)-C(22)-H(22B)   | 109.5      |
| H(22A)-C(22)-H(22B) | 109.5      |
| N(2)-C(22)-H(22C)   | 109.5      |
| H(22A)-C(22)-H(22C) | 109.5      |
| H(22B)-C(22)-H(22C) | 109.5      |
| C(27)-N(3)-C(23)    | 117.6(3)   |
| C(27)-N(3)-Pd(1)    | 123.1(3)   |
| C(23)-N(3)-Pd(1)    | 118.7(2)   |
| N(3)-C(23)-C(24)    | 122.9(4)   |
| N(3)-C(23)-H(23)    | 118.6      |
| C(24)-C(23)-H(23)   | 118.6      |
| C(25)-C(24)-C(23)   | 118.2(4)   |
| C(25)-C(24)-H(24)   | 120.9      |
| C(23)-C(24)-H(24)   | 120.9      |
| C(24)-C(25)-C(26)   | 119.7(4)   |
| C(24)-C(25)-H(25)   | 120.1      |
| C(26)-C(25)-H(25)   | 120.1      |
| C(27)-C(26)-C(25)   | 118.7(4)   |

|                   |            |
|-------------------|------------|
| C(27)-C(26)-H(26) | 120.6      |
| C(25)-C(26)-H(26) | 120.6      |
| N(3)-C(27)-C(26)  | 122.9(4)   |
| N(3)-C(27)-H(27)  | 118.6      |
| C(26)-C(27)-H(27) | 118.6      |
| O(2)-Cl(1)-O(3)   | 109.65(18) |
| O(2)-Cl(1)-O(5)   | 109.05(17) |
| O(3)-Cl(1)-O(5)   | 109.72(18) |
| O(2)-Cl(1)-O(4)   | 110.09(18) |
| O(3)-Cl(1)-O(4)   | 109.42(16) |
| O(5)-Cl(1)-O(4)   | 108.90(17) |

---

Table S19. Anisotropic displacement parameters ( $\text{\AA}^2 \times 10^3$ ) for **7b**. The anisotropic displacement factor exponent takes the form:  $-2\pi^2 [ h^2 a^{*2} U^{11} + \dots + 2 h k a^* b^* U^{12} ]$

|       | $U^{11}$ | $U^{22}$ | $U^{33}$ | $U^{23}$ | $U^{13}$ | $U^{12}$ |
|-------|----------|----------|----------|----------|----------|----------|
| Pd(1) | 12(1)    | 18(1)    | 13(1)    | 3(1)     | 3(1)     | 2(1)     |
| C(1)  | 18(2)    | 22(2)    | 16(2)    | -2(2)    | 7(1)     | -2(2)    |
| C(2)  | 20(2)    | 35(2)    | 23(2)    | 7(2)     | 6(2)     | 5(2)     |
| C(3)  | 15(2)    | 51(3)    | 31(2)    | 1(2)     | 9(2)     | 6(2)     |
| C(4)  | 18(2)    | 42(2)    | 26(2)    | -1(2)    | 11(2)    | -9(2)    |
| C(5)  | 24(2)    | 30(2)    | 18(2)    | 1(2)     | 10(2)    | -1(2)    |
| C(6)  | 14(2)    | 18(2)    | 17(2)    | -3(1)    | 6(1)     | 0(1)     |
| P(1)  | 14(1)    | 16(1)    | 12(1)    | 1(1)     | 5(1)     | 0(1)     |
| C(7)  | 18(2)    | 14(2)    | 16(2)    | -2(1)    | 7(1)     | -3(1)    |
| C(8)  | 18(2)    | 20(2)    | 21(2)    | 3(2)     | 7(1)     | -1(2)    |
| C(9)  | 21(2)    | 21(2)    | 28(2)    | -5(2)    | 13(2)    | 0(2)     |
| C(10) | 27(2)    | 27(2)    | 16(2)    | -4(2)    | 8(2)     | -10(2)   |
| C(11) | 20(2)    | 21(2)    | 18(2)    | 5(2)     | -1(1)    | -4(2)    |
| C(12) | 19(2)    | 16(2)    | 18(2)    | 2(1)     | 7(1)     | -2(1)    |
| C(13) | 14(2)    | 13(2)    | 16(2)    | 0(1)     | 4(1)     | 1(1)     |
| C(14) | 23(2)    | 20(2)    | 18(2)    | -1(2)    | 5(2)     | -2(2)    |
| C(15) | 25(2)    | 22(2)    | 28(2)    | 8(2)     | 3(2)     | -4(2)    |
| C(16) | 24(2)    | 14(2)    | 34(2)    | 0(2)     | -4(2)    | 1(2)     |
| C(17) | 27(2)    | 31(2)    | 24(2)    | -16(2)   | 3(2)     | 2(2)     |
| C(18) | 22(2)    | 25(2)    | 14(2)    | -2(2)    | 4(1)     | -1(2)    |
| N(1)  | 13(1)    | 25(2)    | 16(1)    | 9(1)     | 5(1)     | 4(1)     |
| C(19) | 19(2)    | 23(2)    | 14(2)    | 2(2)     | 8(1)     | 3(2)     |
| C(20) | 17(2)    | 13(2)    | 15(2)    | -4(1)    | 7(1)     | 0(1)     |
| O(1)  | 15(1)    | 22(1)    | 18(1)    | 6(1)     | 6(1)     | 2(1)     |
| N(2)  | 17(2)    | 20(2)    | 16(1)    | 0(1)     | 6(1)     | -1(1)    |
| C(21) | 24(2)    | 23(2)    | 25(2)    | 2(2)     | 10(2)    | -4(2)    |
| C(22) | 13(2)    | 38(2)    | 23(2)    | 4(2)     | 2(2)     | 4(2)     |
| N(3)  | 15(2)    | 23(2)    | 19(2)    | 3(1)     | 5(1)     | 2(1)     |
| C(23) | 20(2)    | 23(2)    | 22(2)    | 1(2)     | 2(2)     | -1(2)    |
| C(24) | 31(2)    | 24(2)    | 32(2)    | 9(2)     | 9(2)     | 4(2)     |
| C(25) | 28(2)    | 39(3)    | 23(2)    | 14(2)    | 0(2)     | 7(2)     |
| C(26) | 22(2)    | 33(2)    | 26(2)    | 2(2)     | -2(2)    | 1(2)     |
| C(27) | 19(2)    | 22(2)    | 25(2)    | 3(2)     | 4(2)     | -1(2)    |
| Cl(1) | 22(1)    | 20(1)    | 17(1)    | -1(1)    | 6(1)     | 0(1)     |
| O(2)  | 48(2)    | 44(2)    | 19(1)    | 6(1)     | 12(1)    | 4(2)     |
| O(3)  | 25(2)    | 36(2)    | 43(2)    | -11(1)   | 16(1)    | -2(1)    |
| O(4)  | 24(2)    | 28(2)    | 36(2)    | -8(1)    | 3(1)     | -1(1)    |
| O(5)  | 46(2)    | 20(2)    | 28(2)    | 1(1)     | 8(1)     | 3(1)     |

Table S20. Hydrogen coordinates ( $\times 10^4$ ) and isotropic displacement parameters ( $\text{\AA}^2 \times 10^{-3}$ )  
for **7b**.

|        | x     | y     | z    | U(eq) |
|--------|-------|-------|------|-------|
| H(2)   | 5629  | 828   | 6264 | 31    |
| H(3)   | 6804  | 1453  | 5574 | 38    |
| H(4)   | 6245  | 2510  | 4386 | 33    |
| H(5)   | 4462  | 2900  | 3864 | 28    |
| H(8)   | 3220  | 885   | 3328 | 23    |
| H(9)   | 2352  | 74    | 2027 | 27    |
| H(10)  | 650   | 566   | 1252 | 27    |
| H(11)  | -175  | 1859  | 1743 | 25    |
| H(12)  | 671   | 2685  | 3030 | 21    |
| H(14)  | 2483  | 3897  | 3056 | 24    |
| H(15)  | 2266  | 5619  | 2998 | 31    |
| H(16)  | 2027  | 6478  | 4187 | 32    |
| H(17)  | 1911  | 5617  | 5392 | 34    |
| H(18)  | 2153  | 3888  | 5473 | 25    |
| H(19A) | 634   | 1523  | 4541 | 21    |
| H(19B) | 760   | 2471  | 5150 | 21    |
| H(21A) | 448   | -181  | 6778 | 35    |
| H(21B) | -789  | -24   | 6475 | 35    |
| H(21C) | -62   | 720   | 7147 | 35    |
| H(22A) | -847  | 1821  | 4952 | 38    |
| H(22B) | -1361 | 1733  | 5721 | 38    |
| H(22C) | -1454 | 838   | 5065 | 38    |
| H(23)  | 3329  | -1027 | 6652 | 27    |
| H(24)  | 4192  | -1992 | 7841 | 35    |
| H(25)  | 5541  | -1266 | 8937 | 38    |
| H(26)  | 6008  | 396   | 8804 | 35    |
| H(27)  | 5108  | 1294  | 7595 | 27    |

Table S21. Crystal data and structure refinement for **8**.

|                                   |                                                          |                   |
|-----------------------------------|----------------------------------------------------------|-------------------|
| Empirical formula                 | C <sub>21</sub> H <sub>22</sub> Cl <sub>2</sub> N P Pd S |                   |
| Formula weight                    | 528.73                                                   |                   |
| Temperature                       | 100(1) K                                                 |                   |
| Wavelength                        | 0.71073 Å                                                |                   |
| Crystal system                    | Monoclinic                                               |                   |
| Space group                       | P 2 <sub>1</sub> /n                                      |                   |
| Unit cell dimensions              | a = 7.9372(5) Å                                          | α = 90°.          |
|                                   | b = 16.4538(11) Å                                        | β = 90.2140(10)°. |
|                                   | c = 16.6017(11) Å                                        | γ = 90°.          |
| Volume                            | 2168.1(2) Å <sup>3</sup>                                 |                   |
| Z                                 | 4                                                        |                   |
| Density (calculated)              | 1.620 Mg/m <sup>3</sup>                                  |                   |
| Absorption coefficient            | 1.279 mm <sup>-1</sup>                                   |                   |
| F(000)                            | 1064                                                     |                   |
| Crystal size                      | 0.16 x 0.06 x 0.05 mm <sup>3</sup>                       |                   |
| Theta range for data collection   | 1.74 to 27.53°.                                          |                   |
| Index ranges                      | -10 ≤ h ≤ 10, -21 ≤ k ≤ 20, -21 ≤ l ≤ 21                 |                   |
| Reflections collected             | 18890                                                    |                   |
| Independent reflections           | 4967 [R(int) = 0.0577]                                   |                   |
| Completeness to theta = 27.53°    | 99.5 %                                                   |                   |
| Absorption correction             | Semi-empirical from equivalents                          |                   |
| Max. and min. transmission        | 0.93805 and 0.7506                                       |                   |
| Refinement method                 | Full-matrix least-squares on F <sup>2</sup>              |                   |
| Data / restraints / parameters    | 4967 / 0 / 245                                           |                   |
| Goodness-of-fit on F <sup>2</sup> | 1.019                                                    |                   |
| Final R indices [I > 2σ(I)]       | R1 = 0.0454, wR2 = 0.0915                                |                   |
| R indices (all data)              | R1 = 0.0661, wR2 = 0.0999                                |                   |
| Largest diff. peak and hole       | 0.633 and -0.851 e.Å <sup>-3</sup>                       |                   |

Table S22. Atomic coordinates ( $\times 10^4$ ) and equivalent isotropic displacement parameters ( $\text{\AA}^2 \times 10^3$ ) for **8**.  $U(\text{eq})$  is defined as one third of the trace of the orthogonalized  $U^{\text{ij}}$  tensor.

|       | x        | y        | z       | U(eq) |
|-------|----------|----------|---------|-------|
| Pd(1) | 8874(1)  | 750(1)   | 8654(1) | 13(1) |
| P(1)  | 7836(1)  | -574(1)  | 7234(1) | 14(1) |
| N(1)  | 9132(4)  | -214(2)  | 7890(2) | 17(1) |
| C(19) | 10654(5) | -686(2)  | 8102(3) | 20(1) |
| S(1)  | 11720(1) | 768(1)   | 8678(1) | 17(1) |
| Cl(1) | 5969(1)  | 715(1)   | 8643(1) | 22(1) |
| Cl(2) | 8954(1)  | 1805(1)  | 9576(1) | 23(1) |
| C(1)  | 6738(5)  | 255(2)   | 6735(2) | 16(1) |
| C(3)  | 4430(5)  | 745(3)   | 5924(3) | 28(1) |
| C(6)  | 7445(5)  | 1027(2)  | 6747(2) | 20(1) |
| C(20) | 12152(5) | -116(2)  | 8056(3) | 21(1) |
| C(2)  | 5248(5)  | 113(3)   | 6322(2) | 23(1) |
| C(5)  | 6601(6)  | 1665(3)  | 6361(3) | 26(1) |
| C(18) | 10081(5) | -635(2)  | 5978(2) | 21(1) |
| C(7)  | 6294(5)  | -1282(2) | 7622(2) | 15(1) |
| C(21) | 12222(5) | 370(3)   | 9662(2) | 25(1) |
| C(14) | 9239(5)  | -1945(2) | 6487(3) | 21(1) |
| C(13) | 9070(5)  | -1102(2) | 6486(2) | 16(1) |
| C(12) | 5338(5)  | -1796(2) | 7129(3) | 20(1) |
| C(8)  | 6053(5)  | -1295(2) | 8454(3) | 21(1) |
| C(4)  | 5107(6)  | 1515(3)  | 5945(3) | 26(1) |
| C(9)  | 4844(6)  | -1802(3) | 8789(3) | 27(1) |
| C(15) | 10420(5) | -2311(3) | 5991(3) | 23(1) |
| C(16) | 11451(5) | -1852(3) | 5506(3) | 24(1) |
| C(17) | 11256(5) | -1007(3) | 5491(3) | 24(1) |
| C(11) | 4132(5)  | -2306(3) | 7471(3) | 28(1) |
| C(10) | 3892(6)  | -2299(3) | 8290(3) | 31(1) |

Table S23. Bond lengths [Å] and angles [°] for **8**.

|                  |            |
|------------------|------------|
| Pd(1)-N(1)       | 2.042(3)   |
| Pd(1)-S(1)       | 2.2590(10) |
| Pd(1)-Cl(1)      | 2.3068(10) |
| Pd(1)-Cl(2)      | 2.3144(10) |
| P(1)-N(1)        | 1.609(3)   |
| P(1)-C(13)       | 1.806(4)   |
| P(1)-C(7)        | 1.810(4)   |
| P(1)-C(1)        | 1.817(4)   |
| N(1)-C(19)       | 1.478(5)   |
| C(19)-C(20)      | 1.517(5)   |
| C(19)-H(19A)     | 0.9900     |
| C(19)-H(19B)     | 0.9900     |
| S(1)-C(21)       | 1.804(4)   |
| S(1)-C(20)       | 1.816(4)   |
| C(1)-C(2)        | 1.386(6)   |
| C(1)-C(6)        | 1.389(6)   |
| C(3)-C(4)        | 1.376(6)   |
| C(3)-C(2)        | 1.392(6)   |
| C(3)-H(3)        | 0.9500     |
| C(6)-C(5)        | 1.398(6)   |
| C(6)-H(6)        | 0.9500     |
| C(20)-H(20A)     | 0.9900     |
| C(20)-H(20B)     | 0.9900     |
| C(2)-H(2)        | 0.9500     |
| C(5)-C(4)        | 1.392(6)   |
| C(5)-H(5)        | 0.9500     |
| C(18)-C(17)      | 1.379(6)   |
| C(18)-C(13)      | 1.397(5)   |
| C(18)-H(18)      | 0.9500     |
| C(7)-C(12)       | 1.398(5)   |
| C(7)-C(8)        | 1.396(5)   |
| C(21)-H(21A)     | 0.9800     |
| C(21)-H(21B)     | 0.9800     |
| C(21)-H(21C)     | 0.9800     |
| C(14)-C(15)      | 1.387(6)   |
| C(14)-C(13)      | 1.393(6)   |
| C(14)-H(14)      | 0.9500     |
| C(12)-C(11)      | 1.396(6)   |
| C(12)-H(12)      | 0.9500     |
| C(8)-C(9)        | 1.389(6)   |
| C(8)-H(8)        | 0.9500     |
| C(4)-H(4)        | 0.9500     |
| C(9)-C(10)       | 1.386(7)   |
| C(9)-H(9)        | 0.9500     |
| C(15)-C(16)      | 1.376(6)   |
| C(15)-H(15)      | 0.9500     |
| C(16)-C(17)      | 1.399(6)   |
| C(16)-H(16)      | 0.9500     |
| C(17)-H(17)      | 0.9500     |
| C(11)-C(10)      | 1.374(7)   |
| C(11)-H(11)      | 0.9500     |
| C(10)-H(10)      | 0.9500     |
| N(1)-Pd(1)-S(1)  | 85.29(9)   |
| N(1)-Pd(1)-Cl(1) | 94.45(9)   |
| S(1)-Pd(1)-Cl(1) | 179.13(4)  |
| N(1)-Pd(1)-Cl(2) | 172.19(9)  |
| S(1)-Pd(1)-Cl(2) | 87.39(4)   |



|                     |            |
|---------------------|------------|
| Cl(1)-Pd(1)-Cl(2)   | 92.83(4)   |
| N(1)-P(1)-C(13)     | 107.21(17) |
| N(1)-P(1)-C(7)      | 115.30(18) |
| C(13)-P(1)-C(7)     | 107.71(18) |
| N(1)-P(1)-C(1)      | 109.66(18) |
| C(13)-P(1)-C(1)     | 107.99(18) |
| C(7)-P(1)-C(1)      | 108.73(18) |
| C(19)-N(1)-P(1)     | 119.2(3)   |
| C(19)-N(1)-Pd(1)    | 110.1(2)   |
| P(1)-N(1)-Pd(1)     | 129.91(18) |
| N(1)-C(19)-C(20)    | 107.6(3)   |
| N(1)-C(19)-H(19A)   | 110.2      |
| C(20)-C(19)-H(19A)  | 110.2      |
| N(1)-C(19)-H(19B)   | 110.2      |
| C(20)-C(19)-H(19B)  | 110.2      |
| H(19A)-C(19)-H(19B) | 108.5      |
| C(21)-S(1)-C(20)    | 100.5(2)   |
| C(21)-S(1)-Pd(1)    | 103.21(14) |
| C(20)-S(1)-Pd(1)    | 99.86(13)  |
| C(2)-C(1)-C(6)      | 120.4(4)   |
| C(2)-C(1)-P(1)      | 120.4(3)   |
| C(6)-C(1)-P(1)      | 119.2(3)   |
| C(4)-C(3)-C(2)      | 119.7(4)   |
| C(4)-C(3)-H(3)      | 120.2      |
| C(2)-C(3)-H(3)      | 120.2      |
| C(1)-C(6)-C(5)      | 119.1(4)   |
| C(1)-C(6)-H(6)      | 120.4      |
| C(5)-C(6)-H(6)      | 120.4      |
| C(19)-C(20)-S(1)    | 108.5(3)   |
| C(19)-C(20)-H(20A)  | 110.0      |
| S(1)-C(20)-H(20A)   | 110.0      |
| C(19)-C(20)-H(20B)  | 110.0      |
| S(1)-C(20)-H(20B)   | 110.0      |
| H(20A)-C(20)-H(20B) | 108.4      |
| C(1)-C(2)-C(3)      | 120.3(4)   |
| C(1)-C(2)-H(2)      | 119.9      |
| C(3)-C(2)-H(2)      | 119.9      |
| C(4)-C(5)-C(6)      | 120.0(4)   |
| C(4)-C(5)-H(5)      | 120.0      |
| C(6)-C(5)-H(5)      | 120.0      |
| C(17)-C(18)-C(13)   | 120.1(4)   |
| C(17)-C(18)-H(18)   | 119.9      |
| C(13)-C(18)-H(18)   | 119.9      |
| C(12)-C(7)-C(8)     | 119.6(4)   |
| C(12)-C(7)-P(1)     | 123.1(3)   |
| C(8)-C(7)-P(1)      | 117.2(3)   |
| S(1)-C(21)-H(21A)   | 109.5      |
| S(1)-C(21)-H(21B)   | 109.5      |
| H(21A)-C(21)-H(21B) | 109.5      |
| S(1)-C(21)-H(21C)   | 109.5      |
| H(21A)-C(21)-H(21C) | 109.5      |
| H(21B)-C(21)-H(21C) | 109.5      |
| C(15)-C(14)-C(13)   | 119.8(4)   |
| C(15)-C(14)-H(14)   | 120.1      |
| C(13)-C(14)-H(14)   | 120.1      |
| C(14)-C(13)-C(18)   | 119.4(4)   |
| C(14)-C(13)-P(1)    | 122.1(3)   |
| C(18)-C(13)-P(1)    | 117.7(3)   |
| C(7)-C(12)-C(11)    | 119.8(4)   |
| C(7)-C(12)-H(12)    | 120.1      |

|                   |          |
|-------------------|----------|
| C(11)-C(12)-H(12) | 120.1    |
| C(9)-C(8)-C(7)    | 120.2(4) |
| C(9)-C(8)-H(8)    | 119.9    |
| C(7)-C(8)-H(8)    | 119.9    |
| C(3)-C(4)-C(5)    | 120.5(4) |
| C(3)-C(4)-H(4)    | 119.8    |
| C(5)-C(4)-H(4)    | 119.8    |
| C(10)-C(9)-C(8)   | 119.3(4) |
| C(10)-C(9)-H(9)   | 120.3    |
| C(8)-C(9)-H(9)    | 120.3    |
| C(16)-C(15)-C(14) | 120.8(4) |
| C(16)-C(15)-H(15) | 119.6    |
| C(14)-C(15)-H(15) | 119.6    |
| C(15)-C(16)-C(17) | 119.4(4) |
| C(15)-C(16)-H(16) | 120.3    |
| C(17)-C(16)-H(16) | 120.3    |
| C(18)-C(17)-C(16) | 120.3(4) |
| C(18)-C(17)-H(17) | 119.8    |
| C(16)-C(17)-H(17) | 119.8    |
| C(10)-C(11)-C(12) | 119.7(4) |
| C(10)-C(11)-H(11) | 120.1    |
| C(12)-C(11)-H(11) | 120.1    |
| C(9)-C(10)-C(11)  | 121.3(4) |
| C(9)-C(10)-H(10)  | 119.3    |
| C(11)-C(10)-H(10) | 119.3    |

---

Table S24. Anisotropic displacement parameters ( $\text{\AA}^2 \times 10^3$ ) for **8**. The anisotropic displacement factor exponent takes the form:  $-2\pi^2 [ h^2 a^{*2} U^{11} + \dots + 2 h k a^* b^* U^{12} ]$

|       | U <sup>11</sup> | U <sup>22</sup> | U <sup>33</sup> | U <sup>23</sup> | U <sup>13</sup> | U <sup>12</sup> |
|-------|-----------------|-----------------|-----------------|-----------------|-----------------|-----------------|
| Pd(1) | 12(1)           | 12(1)           | 15(1)           | -2(1)           | 0(1)            | -1(1)           |
| P(1)  | 13(1)           | 12(1)           | 17(1)           | -1(1)           | 1(1)            | -1(1)           |
| N(1)  | 13(2)           | 14(2)           | 23(2)           | -5(1)           | -2(1)           | 5(1)            |
| C(19) | 19(2)           | 13(2)           | 29(2)           | -5(2)           | -4(2)           | 3(2)            |
| S(1)  | 14(1)           | 19(1)           | 18(1)           | 1(1)            | 0(1)            | -2(1)           |
| Cl(1) | 14(1)           | 22(1)           | 30(1)           | -5(1)           | 1(1)            | 1(1)            |
| Cl(2) | 27(1)           | 21(1)           | 21(1)           | -6(1)           | 0(1)            | -2(1)           |
| C(1)  | 18(2)           | 15(2)           | 14(2)           | 1(2)            | 3(2)            | 4(2)            |
| C(3)  | 19(2)           | 34(3)           | 31(2)           | 11(2)           | 0(2)            | 0(2)            |
| C(6)  | 24(2)           | 17(2)           | 20(2)           | 1(2)            | 2(2)            | 0(2)            |
| C(20) | 16(2)           | 22(2)           | 25(2)           | -4(2)           | 1(2)            | 2(2)            |
| C(2)  | 22(2)           | 25(2)           | 23(2)           | 6(2)            | 1(2)            | -2(2)           |
| C(5)  | 35(3)           | 16(2)           | 27(2)           | 3(2)            | 11(2)           | -2(2)           |
| C(18) | 25(2)           | 13(2)           | 24(2)           | -2(2)           | 2(2)            | -3(2)           |
| C(7)  | 11(2)           | 13(2)           | 20(2)           | 3(2)            | -1(2)           | -1(2)           |
| C(21) | 21(2)           | 39(3)           | 15(2)           | 5(2)            | -1(2)           | 0(2)            |
| C(14) | 18(2)           | 19(2)           | 27(2)           | 0(2)            | 5(2)            | -3(2)           |
| C(13) | 13(2)           | 19(2)           | 17(2)           | -2(2)           | 2(2)            | 1(2)            |
| C(12) | 17(2)           | 18(2)           | 27(2)           | -4(2)           | 0(2)            | 1(2)            |
| C(8)  | 21(2)           | 15(2)           | 26(2)           | 1(2)            | -3(2)           | 3(2)            |
| C(4)  | 29(2)           | 23(2)           | 27(2)           | 10(2)           | 9(2)            | 12(2)           |
| C(9)  | 33(3)           | 26(2)           | 23(2)           | 12(2)           | 11(2)           | 7(2)            |
| C(15) | 26(2)           | 16(2)           | 27(2)           | -6(2)           | 5(2)            | -1(2)           |
| C(16) | 23(2)           | 24(2)           | 24(2)           | -6(2)           | 9(2)            | 0(2)            |
| C(17) | 28(2)           | 22(2)           | 22(2)           | -1(2)           | 12(2)           | -4(2)           |
| C(11) | 21(2)           | 17(2)           | 45(3)           | -3(2)           | -1(2)           | -2(2)           |
| C(10) | 25(2)           | 17(2)           | 51(3)           | 14(2)           | 11(2)           | 1(2)            |

Table S25. Hydrogen coordinates (  $\times 10^4$ ) and isotropic displacement parameters ( $\text{\AA}^2 \times 10^{-3}$ ) for **8**.

|        | x     | y     | z     | U(eq) |
|--------|-------|-------|-------|-------|
| H(19A) | 10800 | -1144 | 7721  | 24    |
| H(19B) | 10551 | -910  | 8653  | 24    |
| H(3)   | 3410  | 646   | 5639  | 34    |
| H(6)   | 8488  | 1121  | 7014  | 24    |
| H(20A) | 12339 | 54    | 7491  | 25    |
| H(20B) | 13180 | -395  | 8252  | 25    |
| H(2)   | 4782  | -419  | 6310  | 28    |
| H(5)   | 7048  | 2200  | 6382  | 31    |
| H(18)  | 9959  | -61   | 5967  | 25    |
| H(21A) | 11723 | -171  | 9721  | 38    |
| H(21B) | 11769 | 733   | 10076 | 38    |
| H(21C) | 13448 | 332   | 9723  | 38    |
| H(14)  | 8548  | -2268 | 6826  | 25    |
| H(12)  | 5510  | -1797 | 6563  | 25    |
| H(8)   | 6718  | -957  | 8792  | 25    |
| H(4)   | 4550  | 1948  | 5674  | 31    |
| H(9)   | 4671  | -1808 | 9355  | 32    |
| H(15)  | 10519 | -2886 | 5987  | 28    |
| H(16)  | 12287 | -2106 | 5185  | 28    |
| H(17)  | 11935 | -687  | 5144  | 29    |
| H(11)  | 3479  | -2656 | 7139  | 33    |
| H(10)  | 3058  | -2641 | 8519  | 37    |
